# Supplementary material
Source: publisher figshare collection journal article supplement (https://diabetesjournals.figshare.com/ndownloader/files/28198722)
Supplement: Supplementary file 1 [file 28198722]

**Dietary intake of linoleic acid, its concentrations and the risk of type 2  
diabetes: a systematic review and dose-response meta-analysis of prospective  
cohort studies**

**\*Corresponding author:** Ahmad Esmailzadeh, Professor, Department of Community Nutrition, School of Nutritional Sciences and Dietetics, Tehran University of Medical Sciences, P. O. Box 14155/6117, Tehran, Iran Telefax: +98(21)88955979, Email: [a-esmailzadeh@tums.ac.ir](mailto:a-esmailzadeh@tums.ac.ir)

Supplementary data including 9 supplemental Tables, and 7 supplemental Figures

**Supplemental Table 1.** Search strategy to find the relevant articles for inclusion in this meta-analysis of dietary intake and biomarkers of Linoleic acid and the risk of type 2 diabetes

**PubMed**

"Fatty Acids"[Mesh] OR "Fatty Acids, Unsaturated"[Mesh] OR "Fatty Acids, Essential"[Mesh] OR "Linoleic Acid"[Mesh] OR "Linoleic Acids"[Mesh] OR "Fatty Acids, Omega-6"[Mesh] OR "n-6 fatty acid\*"[Title/Abstract] OR "omega-6 fatty acid\*"[Title/Abstract] OR "Omega 6 Fatty Acids"[Title/Abstract] OR "N-6 Fatty Acids"[Title/Abstract] OR "Linoleic Acids"[Title/Abstract] OR "Linoleic Acid"[Title/Abstract] OR " $\alpha$ -linoleic acid\*"[Title/Abstract] OR "Linoleic Acids"[Title/Abstract] OR "Linoleic Acid"[Title/Abstract] OR "Linoelaidic Acid"[Title/Abstract] OR "Linolelaidic Acid"[Title/Abstract] OR "essential fatty acid\*"[Title/Abstract] OR "polyunsaturated fatty acid\*"[Title/Abstract] OR "fatty acid"[Title/Abstract] OR "sunflower oil"[Title/Abstract] OR "corn oil"[Title/Abstract]  
AND

"Diabetes Mellitus, Type 2"[Mesh] OR "Diabetes Mellitus"[Mesh] OR Diabetes[Title/Abstract] OR Diabetic[Title/Abstract] OR "Diabetes type 2"[Title/Abstract] OR "Type II diabetes"[Title/Abstract] OR "Type 2 diabetes"[Title/Abstract] OR "Type 2 diabetes mellitus"[Title/Abstract] OR "Diabetes mellitus non-insulin dependent"[Title/Abstract] OR "Noninsulin dependent diabetes mellitus"[Title/Abstract]  
AND

"Cohort Studies"[Mesh] OR "Observation"[Mesh] OR "Prospective Studies"[Mesh] OR "Longitudinal Studies"[Mesh] OR "Follow-Up Studies"[Mesh] OR "Case-Control Studies"[Mesh] OR Cohort\*[Title/Abstract] OR "Cohort Studies"[Title/Abstract] OR "Concurrent Study"[Title/Abstract] OR "Incidence Studies"[Title/Abstract] OR incident\*[Title/Abstract] OR incidence\*[Title/Abstract] OR Observation[Title/Abstract] OR "Prospective Studies"[Title/Abstract] OR Prospectively[Title/Abstract] OR Prospective[Title/Abstract] OR Longitudinal[Title/Abstract] OR Observational[Title/Abstract] OR Follow-Up[Title/Abstract] OR Nested[Title/Abstract] OR "Relative risk"[Title/Abstract] OR "Hazard ratio"[Title/Abstract] OR RR[Title/Abstract] OR HR[Title/Abstract]

**Scopus**

TITLE-ABS-KEY ( "n-6 fatty acid" ) OR TITLE-ABS-KEY ( "omega-6 fatty acid" ) OR  
 TITLE-ABS-KEY ( "Omega 6 Fatty Acids" ) OR TITLE-ABS-KEY ( "N-6 Fatty Acids" )  
 OR TITLE-ABS-KEY ( "Linoleic Acids" ) OR TITLE-ABS-KEY ( "Linoleic Acid" ) OR  
 TITLE-ABS-KEY ( "α-linolenic acid" ) OR TITLE-ABS-KEY ( "Linoleic Acids" ) OR  
 TITLE-ABS-KEY ( "Linoleic Acid" ) OR TITLE-ABS-KEY ( "Linoelaidic Acid" ) OR  
 TITLE-ABS-KEY ( "Linolelaidic Acid" ) OR TITLE-ABS-KEY ( "essential fatty acid" )  
 OR TITLE-ABS-KEY ( "polyunsaturated fatty acid" ) OR TITLE-ABS-KEY ( "fatty acid" )  
 OR TITLE-ABS-KEY ( "sunflower oil" ) OR TITLE-ABS-KEY ( "corn oil" )

AND

TITLE-ABS-KEY ( "Diabetes" ) OR TITLE-ABS-KEY ( "Diabetic" ) OR TITLE-ABS-KEY  
 ( "Diabetes type 2" ) OR TITLE-ABS-KEY ( "Type II diabetes" ) OR TITLE-ABS-KEY ( "Type  
 2 diabetes" ) OR TITLE-ABS-KEY ( "Type 2 diabetes mellitus" ) OR TITLE-ABS-KEY ( "  
 Non-insulin dependent diabetes" ) OR TITLE-ABS-KEY ( "Noninsulin dependent diabetes  
 mellitus" ) OR TITLE-ABS-KEY ( "Diabetes mellitus non-insulin dependent" )

AND

TITLE-ABS-KEY ( "Cohort Studies" ) OR TITLE-ABS-KEY ( observation ) OR TITLE-  
 ABS-KEY ( "Prospective Studies" ) OR TITLE-ABS-KEY ( "Longitudinal Studies" ) OR  
 TITLE-ABS-KEY ( "Observational Study" ) OR TITLE-ABS-KEY ( "Follow-Up Studies" )  
 OR TITLE-ABS-KEY ( "Case-Control Studies" ) OR TITLE-ABS-KEY ( cohorts ) OR  
 TITLE-ABS-KEY ( cohort ) OR TITLE-ABS-KEY ( "Cohort Studies" ) OR TITLE-ABS-  
 KEY ( "Concurrent Study" ) OR TITLE-ABS-KEY ( "Incidence Studies" ) OR TITLE-  
 ABS-KEY ( incident ) OR TITLE-ABS-KEY ( incidence ) OR TITLE-ABS-KEY (   
 observation ) OR TITLE-ABS-KEY ( "Prospective Studies" ) OR TITLE-ABS-KEY (   
 prospectively ) OR TITLE-ABS-KEY ( prospective ) OR TITLE-ABS-KEY ( longitudinal )  
 OR TITLE-ABS-KEY ( observational ) OR TITLE-ABS-KEY ( follow-up ) OR TITLE-  
 ABS-KEY ( nested ) OR TITLE-ABS-KEY ( "Relative risk" ) OR TITLE-ABS-KEY (   
 "Hazard ratio" )

## Supplementary data

**Web of Science**

TS= ("n-6 fatty acid" OR "omega-6 fatty acid" OR "Omega 6 Fatty Acids" OR "N-6 Fatty Acids" OR "Linoleic Acids" OR "Linoleic Acid" OR "Linoleic Acids" OR "Linoelaidic Acid" OR "Linolelaidic Acid" OR "essential fatty acid" OR "polyunsaturated fatty acid" OR "fatty acid" OR "sunflower oil" OR "corn oil")

AND

TS= ("Diabetes" OR "Diabetic" OR "Diabetes type 2" OR "Type II diabetes" OR "Type 2 diabetes" OR "Type 2 diabetes mellitus" OR "Diabetes Mellitus" OR "Noninsulin dependent diabetes mellitus" OR "Diabetes mellitus non-insulin-dependent")

AND

TS= ("Cohorts" OR "Cohort" OR "Cohort Studies" OR "Concurrent Study" OR "Incidence Studies" OR "incident" OR "incidence" OR "Observation" OR "Prospective Studies" OR "Prospectively" OR "Prospective" OR "Longitudinal" OR "Observational" OR "Follow-Up " OR "Nested" OR "Relative risk" OR "Hazard ratio" OR "Case-Control Studies")

## Supplementary data

| <b>Supplemental Table 2:</b> Reason for exclusion of retrieved articles                                                                                                                                                                                                                 |                             |
|-----------------------------------------------------------------------------------------------------------------------------------------------------------------------------------------------------------------------------------------------------------------------------------------|-----------------------------|
| References                                                                                                                                                                                                                                                                              | Reason for exclusion        |
| 1. Feskens EJM, Virtanen SM, Räsänen L, Tuomilehto J, Stengård J, Pekkanen J, et al. Dietary factors determining diabetes and impaired glucose tolerance: A 20-year follow-up of the Finnish and Dutch cohorts of the Seven Countries Study. <i>Diabetes Care</i> . 1995;18(8):1104-12. | Not assessed LA as exposure |
| 2. Harding AH, Day NE, Khaw KT, Bingham S, Luben R, Welsh A, et al. Dietary Fat and the Risk of Clinical Type 2 Diabetes: The European Prospective Investigation of Cancer-Norfolk Study. <i>American Journal of Epidemiology</i> . 2004;159(1):73-82.                                  | Not assessed LA as exposure |
| 3. Pankow JS, Duncan BB, Schmidt MI, Ballantyne CM, Couper DJ, Hoogeveen RC, et al. Fasting plasma free fatty acids and risk of type 2 diabetes: The Atherosclerosis Risk in Communities study. <i>Diabetes Care</i> . 2004;27(1):77-82.                                                | Not assessed LA as exposure |
| 4. Kaushik M, Mozaffarian D, Spiegelman D, Manson JE, Willett WC, Hu FB. Long-chain omega-3 fatty acids, fish intake, and the risk of type 2 diabetes mellitus. <i>American Journal of Clinical Nutrition</i> . 2009;90(3):613-20.                                                      | Not assessed LA as exposure |
| 5. Brostow DP, Odegaard AO, Koh WP, Duval S, Gross MD, Yuan JM, et al. Omega-3 fatty acids and incident type 2 diabetes: The Singapore Chinese Health Study. <i>American Journal of Clinical Nutrition</i> . 2011;94(2):520-6.                                                          | Not assessed LA as exposure |
| 6. Djousse L, Biggs ML, Lemaitre RN, King IB, Song X, Ix JH, et al. Plasma omega-3 fatty acids and incident diabetes in older adults. <i>The American journal of clinical nutrition</i> . 2011;94(2):527-33.                                                                            | Not assessed LA as exposure |
| 7. Djoussé L, Gaziano JM, Buring JE, Lee IM. Dietary omega-3 fatty acids and fish consumption and risk of type 2 diabetes. <i>American Journal of Clinical Nutrition</i> . 2011;93(1):143-50.                                                                                           | Not assessed LA as exposure |
| 8. Villegas R, Xiang YB, Elasy T, Li HL, Yang G, Cai H, et al. Fish, shellfish, and long-chain n-3 fatty acid consumption and risk of incident type 2 diabetes in middle-aged Chinese men and women. <i>American Journal of Clinical Nutrition</i> . 2011;94(2):543-51.                 | Not assessed LA as exposure |

## Supplementary data

|                                                                                                                                                                                                                                                                                                                          |                             |
|--------------------------------------------------------------------------------------------------------------------------------------------------------------------------------------------------------------------------------------------------------------------------------------------------------------------------|-----------------------------|
| 9. Djousse L, Khawaja O, Bartz TM, Biggs ML, Ix JH, Ziemann SJ, et al. Plasma fatty acid-binding protein 4, nonesterified fatty acids, and incident diabetes in older adults. <i>Diabetes Care</i> . 2012;35(8):1701-7.                                                                                                  | Not assessed LA as exposure |
| 10. Patel PS, Forouhi NG, Kuijsten A, Schulze MB, Van Woudenberg GJ, Ardanaz E, et al. The prospective association between total and type of fish intake and type 2 diabetes in 8 European countries: EPIC-InterAct study. <i>American Journal of Clinical Nutrition</i> . 2012;95(6):1445-53.                           | Not assessed LA as exposure |
| 11. Imamura F, Lemaitre RN, King IB, Song XL, Siscovick DS, Mozaffarian D. Circulating Fatty Acid Patterns and Incidence of Type 2 Diabetes Mellitus: The Cardiovascular Health Study. <i>Circulation</i> . 2013;127(12).                                                                                                | Not assessed LA as exposure |
| 12. Mozaffarian D, De Oliveira Otto MC, Lemaitre RN, Fretts AM, Hotamisligil G, Tsai MY, et al. Trans-Palmitoleic acid, other dairy fat biomarkers, and incident diabetes: The multi-ethnic study of atherosclerosis (MESA). <i>American Journal of Clinical Nutrition</i> . 2013;97(4):854-61.                          | Not assessed LA as exposure |
| 13. Alhazmi A, Stojanovski E, McEvoy M, Garg ML. Macronutrient intake and type 2 diabetes risk in middle-aged Australian women. Results from the Australian longitudinal study on women's health. <i>Public Health Nutrition</i> . 2014;17(7):1587-94.                                                                   | Not assessed LA as exposure |
| 14. Forouhi NG, Koulman A, Sharp SJ, Imamura F, Kröger J, Schulze MB, et al. Differences in the prospective association between individual plasma phospholipid saturated fatty acids and incident type 2 diabetes: The EPIC-InterAct case-cohort study. <i>The Lancet Diabetes and Endocrinology</i> . 2014;2(10):810-8. | Not assessed LA as exposure |
| 15. Koloverou E, Panagiotakos DB, Pitsavos C, Chrysoshoou C, Georgousopoulou EN, Pitaraki E, et al. 10-year incidence of diabetes and associated risk factors in Greece: the ATTICA study (2002-2012). <i>The review of diabetic studies : RDS</i> . 2014;11(2):181-9.                                                   | Not assessed LA as exposure |
| 16. Virtanen JK, Mursu J, Voutilainen S, Uusitupa M, Tuomainen TP. Serum omega-3 polyunsaturated fatty acids and risk of incident type 2 diabetes in men: The kuopio ischemic heart disease risk factor study. <i>Diabetes Care</i> . 2014;37(1):189-96.                                                                 | Not assessed LA as exposure |
| 17. Ericson U, Hellstrand S, Brunkwall L, Schulz CA, Sonestedt E, Wallström P, et al. Food sources of fat may clarify the inconsistent role of dietary fat intake for incidence of type 2 diabetes. <i>American Journal of Clinical Nutrition</i> . 2015;101(5):1065-80.                                                 | Not assessed LA as exposure |

## Supplementary data

|                                                                                                                                                                                                                                                                                                                                                                                                                         |                             |
|-------------------------------------------------------------------------------------------------------------------------------------------------------------------------------------------------------------------------------------------------------------------------------------------------------------------------------------------------------------------------------------------------------------------------|-----------------------------|
| 18. Jacobs S, Schiller K, Jansen E, Boeing H, Schulze MB, Kroger J. Evaluation of various biomarkers as potential mediators of the association between Delta 5 desaturase, Delta 6 desaturase, and stearoyl-CoA desaturase activity and incident type 2 diabetes in the European Prospective Investigation into Cancer and Nutrition-Potsdam Study. <i>American Journal of Clinical Nutrition</i> . 2015;102(1):155-64. | Not assessed LA as exposure |
| 19. Lemaitre RN, Fretts AM, Sitlani CM, Biggs ML, Mukamal K, King IB, et al. Plasma phospholipid very-long-chain saturated fatty acids and incident diabetes in older adults: the Cardiovascular Health Study. <i>The American journal of clinical nutrition</i> . 2015;101(5):1047-54.                                                                                                                                 | Not assessed LA as exposure |
| 20. Ma W, Wu JH, Wang Q, Lemaitre RN, Mukamal KJ, Djousse L, et al. Prospective association of fatty acids in the de novo lipogenesis pathway with risk of type 2 diabetes: the Cardiovascular Health Study. <i>The American journal of clinical nutrition</i> . 2015;101(1):153-63.                                                                                                                                    | Not assessed LA as exposure |
| 21. Wang Q, Imamura F, Ma W, Wang M, Lemaitre RN, King IB, et al. Circulating and dietary trans fatty acids and incident type 2 diabetes in older adults: The cardiovascular health study. <i>Diabetes Care</i> . 2015;38(6):1099-107.                                                                                                                                                                                  | Not assessed LA as exposure |
| 22. Wenjie M, Wu JHY, Wang Q, Lemaitre RN, Mukamal KJ, Djoussé L, et al. Prospective association of fatty acids in the de novo lipogenesis pathway with risk of type 2 diabetes: The Cardiovascular Health Study. <i>American Journal of Clinical Nutrition</i> . 2015;101(1):153-63.                                                                                                                                   | Not assessed LA as exposure |
| 23. Yakoob MY, Shi PL, Willett WC, Rexrode KM, Campos H, Orav EJ, et al. Circulating Biomarkers of Dairy Fat and Risk of Incident Diabetes Mellitus Among Men and Women in the United States in Two Large Prospective Cohorts. <i>Circulation</i> . 2016;133(17):1645-54.                                                                                                                                               | Not assessed LA as exposure |
| 24. Imamura F, Sharp SJ, Koulman A, Schulze MB, Kröger J, Griffin JL, et al. A combination of plasma phospholipid fatty acids and its association with incidence of type 2 diabetes: The EPIC-InterAct case-cohort study. <i>PLoS Medicine</i> . 2017;14(10).                                                                                                                                                           | Not assessed LA as exposure |
| 25. Itcho K, Yoshii Y, Ohno H, Oki K, Shinohara M, Irino Y, et al. Association between serum elaidic acid concentration and insulin resistance in two Japanese cohorts with different lifestyles. <i>Journal of Atherosclerosis and Thrombosis</i> . 2017;24(12):1206-14.                                                                                                                                               | Not assessed LA as exposure |

## Supplementary data

|                                                                                                                                                                                                                                                                                                                                                                                     |                             |
|-------------------------------------------------------------------------------------------------------------------------------------------------------------------------------------------------------------------------------------------------------------------------------------------------------------------------------------------------------------------------------------|-----------------------------|
| 26. Krishnan S, Steffen LM, Paton CM, Cooper JA. Impact of dietary fat composition on prediabetes: a 12-year follow-up study. <i>Public Health Nutr.</i> 2017;20(9):1617-26.                                                                                                                                                                                                        | Not assessed LA as exposure |
| 27. Lin JS, Dong HL, Chen GD, Chen ZY, Dong XW, Zheng JS, et al. Erythrocyte saturated fatty acids and incident type 2 diabetes in chinese men and women: A prospective cohort study. <i>Nutrients.</i> 2018;10(10).                                                                                                                                                                | Not assessed LA as exposure |
| 28. Shi L, Brunius C, Lehtonen M, Auriola S, Bergdahl IA, Rolandsson O, et al. Plasma metabolites associated with type 2 diabetes in a Swedish population: a case-control study nested in a prospective cohort. <i>Diabetologia.</i> 2018;61(4):849-61.                                                                                                                             | Not assessed LA as exposure |
| 29. Wang Y, Meng X, Deng X, Okekunle AP, Wang P, Zhang Q, et al. Postprandial Saturated Fatty Acids Increase the Risk of Type 2 Diabetes: A Cohort Study in a Chinese Population. <i>Journal of Clinical Endocrinology and Metabolism.</i> 2018;103(4):1438-46.                                                                                                                     | Not assessed LA as exposure |
| 30. Gaeni Z, Bahadoran Z, Mirmiran P, Djazayeri A. The association between dietary fat pattern and the risk of type 2 diabetes. <i>Preventive Nutrition and Food Science.</i> 2019;24(1):1-7.                                                                                                                                                                                       | Not assessed LA as exposure |
| 31. Liu S, van der Schouw YT, Soedamah-Muthu SS, Spijkerman AMW, Sluijs I. Intake of dietary saturated fatty acids and risk of type 2 diabetes in the European Prospective Investigation into Cancer and Nutrition-Netherlands cohort: associations by types, sources of fatty acids and substitution by macronutrients. <i>European Journal of Nutrition.</i> 2019;58(3):1125-36.. | Not assessed LA as exposure |
| 32. Qian F, Korat AVA, Imamura F, Marklund M, Tintle N, Virtanen JK, et al. Omega-3 Fatty Acid Biomarkers and Incident Type 2 Diabetes: An Individual Participant-level Pooling Project of 20 Prospective Cohort Studies. <i>Circulation.</i> 2019;139.                                                                                                                             | Not assessed LA as exposure |
| 33. Seah JYH, Ong CN, Koh WP, Yuan JM, Van Dam RM. A Dietary Pattern Derived from Reduced Rank Regression and Fatty Acid Biomarkers Is Associated with Lower Risk of Type 2 Diabetes and Coronary Artery Disease in Chinese Adults. <i>Journal of Nutrition.</i> 2019;149(11):2001-10.                                                                                              | Not assessed LA as exposure |
| 34. Zhang Y, Zhuang P, Mao L, Chen XQ, Wang J, Cheng LF, et al. Current level of fish and omega-3 fatty acid intakes and risk of Type 2 diabetes in China. <i>Journal of Nutritional Biochemistry.</i> 2019;74.                                                                                                                                                                     | Not assessed LA as exposure |



## Supplementary data

|                                                                                                                                                                                                                                                                                                     |                             |
|-----------------------------------------------------------------------------------------------------------------------------------------------------------------------------------------------------------------------------------------------------------------------------------------------------|-----------------------------|
| 35. Zheng JS, Lin JS, Dong HL, Zeng FF, Li D, Song YQ, et al. Association of erythrocyte n-3 polyunsaturated fatty acids with incident type 2 diabetes in a Chinese population. <i>Clinical Nutrition</i> . 2019;38(5):2195-201.                                                                    | Not assessed LA as exposure |
| 36. Korat AVA, Malik VS, Furtado JD, Sacks F, Rosner B, Rexrode KM, et al. Circulating Very-Long-Chain SFA Concentrations Are Inversely Associated with Incident Type 2 Diabetes in US Men and Women. <i>Journal of Nutrition</i> . 2020;150(2):340-9.                                              | Not assessed LA as exposure |
| 37. Li N, Qiu Y, Wu Y, Zhang M, Lai Z, Wang Q, et al. Association of serum total fatty acids with type 2 diabetes. <i>Clinica Chimica Acta</i> . 2020;500:59-68.                                                                                                                                    | Not assessed LA as exposure |
| 38. Weir NL, Steffen BT, Guan W, Johnson LM, Djousse L, Mukamal KJ, et al. Circulating omega-7 fatty acids are differentially related to metabolic dysfunction and incident type II diabetes: The Multi-Ethnic Study of Atherosclerosis (MESA). <i>Diabetes and Metabolism</i> . 2020;46(4):319-25. | Not assessed LA as exposure |
| 39. Lindström J, Peltonen M, Eriksson JG, Louheranta A, Fogelholm M, Uusitupa M, et al. High-fibre, low-fat diet predicts long-term weight loss and decreased type 2 diabetes risk: The Finnish Diabetes Prevention Study. <i>Diabetologia</i> . 2006;49(5):912-20.                                 | Not assessed LA as exposure |
| 40. Tso AW, Xu A, Sham PC, Wat NM, Wang Y, Fong CH, et al. Serum adipocyte fatty acid binding protein as a new biomarker predicting the development of type 2 diabetes: a 10-year prospective study in a Chinese cohort. <i>Diabetes Care</i> . 2007;30(10):2667-72.                                | Not assessed LA as exposure |
| 41. Meyer KA, Kushi LH, Jacobs Jr DR, Folsom AR. Dietary fat and incidence of type 2 diabetes in older Iowa women. <i>Diabetes Care</i> . 2001;24(9):1528-35.                                                                                                                                       | Not assessed LA as exposure |
| 42. Laaksonen DE, Lakka TA, Lakka HM, Nyyssönen K, Rissanen T, Niskanen LK, et al. Serum fatty acid composition predicts development of impaired fasting glycaemia and diabetes in middle-aged men. <i>Diabetic Medicine</i> . 2002;19(6):456-64.                                                   | Not relevant outcome        |
| 43. Wurtz P, Tiainen M, Makinen VP, Kangas AJ, Soininen P, Saltevo J, et al. Circulating metabolite predictors of glycemia in middle-aged men and women. <i>Diabetes Care</i> . 2012;35(8):1749-56.                                                                                                 | Not relevant outcome        |

## Supplementary data

|                                                                                                                                                                                                                                                                                        |                     |
|----------------------------------------------------------------------------------------------------------------------------------------------------------------------------------------------------------------------------------------------------------------------------------------|---------------------|
| 44. Clandinin MT, Wilke MS. Do trans fatty acids increase the incidence of type 2 diabetes? American Journal of Clinical Nutrition. 2001;73(6):1001-2.                                                                                                                                 | Other study designs |
| 45. Liu W. Concerns regarding the interpretation of fatty fish intake and type 2 diabetes in the EPIC-InterAct Study. American Journal of Clinical Nutrition. 2012;96(4):941.                                                                                                          | Other study designs |
| 46. Jeppesen C, Schiller K, Schulze MB. Omega-3 and omega-6 fatty acids and type 2 diabetes. Current Diabetes Reports. 2013;13(2):279-88.                                                                                                                                              | Other study designs |
| 47. Henderson G, Crofts C, Schofield G. Linoleic acid and diabetes prevention. The Lancet Diabetes and Endocrinology. 2018;6(1):12-3.                                                                                                                                                  | Other study designs |
| 48. Fretts AM, Imamura F, Marklund M, Micha R, Wu JHY, Murphy RA, et al. Associations of circulating very-long-chain saturated fatty acids and incident type 2 diabetes: A pooled analysis of prospective cohort studies. American Journal of Clinical Nutrition. 2019;109(4):1216-23. | Other study designs |
| 49. Imamura F, Fretts AM, Marklund M, Ardisson Korat AV, Yang WS, Lankinen M, et al. Fatty acids in the de novo lipogenesis pathway and incidence of type 2 diabetes: A pooled analysis of prospective cohort studies. PLoS Medicine. 2020;17(6).                                      | Other study designs |
| 50. Shetty SS, Kumari NS, Shetty PK. omega-6/omega-3 fatty acid ratio as an essential predictive biomarker in the management of type 2 diabetes mellitus. Nutrition. 2020;79-80:110968.                                                                                                | Other study designs |
| 51. Zulyniak MA, Fuller H, Iles MM. Investigation of the Causal Association between Long-Chain n-6 Polyunsaturated Fatty Acid Synthesis and the Risk of Type 2 Diabetes: A Mendelian Randomization Analysis. Lifestyle Genomics. 2020;13(5):146-53.                                    | Other study designs |
| 52. Hernández-Alonso P, Salas-Salvadó J, Ruiz-Canela M, Corella D, Estruch R, Fitó M, et al. High dietary protein intake is associated with an increased body weight and total death risk. Clinical Nutrition. 2016;35(2):496-506.                                                     | Duplicate report    |
| 53. Salmeron J, Hu FB, Manson JE, Stampfer MJ, Colditz GA, Rimm EB, et al. Dietary fat intake and risk of type 2 diabetes in women. The American journal of clinical nutrition. 2001;73(6):1019-26.                                                                                    | Duplicate report    |

## Supplementary data

|                                                                                                                                                                                                                                                                   |                       |
|-------------------------------------------------------------------------------------------------------------------------------------------------------------------------------------------------------------------------------------------------------------------|-----------------------|
| 54. van Dam RM, Stampfer M, Willett WC, Hu FB, Rimm EB. Dietary fat and meat intake in relation to risk of type 2 diabetes in men. <i>Diabetes Care</i> . 2002;25(3):417-24.                                                                                      | Duplicate report      |
| 55. Wang L, Folsom AR, Zheng ZJ, Pankow JS, Eckfeldt JH. Plasma fatty acid composition and incidence of diabetes in middle aged adults: The Atherosclerosis Risk in Communities (ARIC) Study. <i>Circulation</i> . 2002;106(19):731-.                             | Duplicate report      |
| 56. Dow C, Mangin M, Balkau B, Affret A, Boutron-Ruault MC, Clavel-Chapelon F, et al. Fatty acid consumption and incident type 2 diabetes: evidence from the E3N cohort study. <i>Diabetologia</i> . 2016;59:S145-S.                                              | Duplicate report      |
| 57. Wu JH, Marklund M, Imamura F, Tintle N, Korat AVA, de Goede J, et al. Omega-6 Fatty Acid Biomarkers and Incident Type 2 Diabetes: A Pooled Analysis of 20 Cohort Studies. <i>Circulation</i> . 2017;135.                                                      | Duplicate report      |
| 58. Lu Y, Wang Y, Zou L, Liang X, Ong CN, Tavintharan S, et al. Serum lipids in association with type 2 diabetes risk and prevalence in a Chinese population. <i>Journal of Clinical Endocrinology and Metabolism</i> . 2018;103(2):671-80.                       | Duplicate report      |
| 59. Zong G, Liu G, Wanders AJ, Alssema M, Zock PL, Willett W, et al. Dietary Linoleic Acid Intake Is Inversely Associated With Type 2 Diabetes Risk In Three Large Prospective Cohort Studies Of U.s. Men And Women. <i>Circulation</i> . 2018;137.               | Duplicate report      |
| 60. Ahola-Olli AV, Mustelin L, Kalimeri M, Kettunen J, Jokelainen J, Auvinen J, et al. Circulating metabolites and the risk of type 2 diabetes: a prospective study of 11,896 young adults from four Finnish cohorts. <i>Diabetologia</i> . 2019;62(12):2298-309. | Duplicate report      |
| 61. Ahola-Olli AV, Mustelin L, Kalimeri M, Kettunen J, Jokelainen J, Auvinen J, et al. Circulating metabolites and the risk of type 2 diabetes: a prospective study of 11,896 young adults from four Finnish cohorts. <i>Diabetologia</i> . 2019;62(12):2298-309. | Duplicate report      |
| 62. Harbers MC, Pertiwi K, Soedamah-Muthu SS, de Goede J, Molenberg FJ, Wanders AJ, et al. Plasma and Dietary Linoleic Acid and Diabetes Incidence After Myocardial Infarction. <i>Circulation</i> . 2018;137.                                                    | Conducted on patients |

## Supplementary data

|                                                                                                                                                                                                                                                                              |                         |
|------------------------------------------------------------------------------------------------------------------------------------------------------------------------------------------------------------------------------------------------------------------------------|-------------------------|
| 63. Pertiwi K, Wanders AJ, Harbers MC, Kupers LK, Soedamah-Muthu SS, de Goede J, et al. Plasma and Dietary Linoleic Acid and 3-Year Risk of Type 2 Diabetes After Myocardial Infarction: A Prospective Analysis in the Alpha Omega Cohort. Diabetes Care. 2020;43(2):358-65. | Conducted on patients   |
| 64. Vessby B, Aro A, Skarfors E, Berglund L, Salminen I, Lithell H. The risk to develop NIDDM is related to the fatty acid composition of the serum cholesterol esters. Diabetes. 1994;43(11):1353-7.                                                                        | No risk estimates       |
| 65. Alhazmi A, Stojanovski E, McEvoy M, Garg ML. Macronutrient intake and type 2 diabetes risk in middle-aged Australian women. Results from the australian longitudinal study on women's health. Public Health Nutrition. 2014;17(7):1587-94.                               | without sufficient data |

| Supplemental Table 3. General characteristics of prospective cohort studies that investigated the association between LA intake and risk of type 2 diabetes. |                       |                              |                   |                        |        |             |                    |                                                                                                                     |                                                 |                                                                                          |                                                                                                                                                                                                                                                                                                                                                                                                                    |
|--------------------------------------------------------------------------------------------------------------------------------------------------------------|-----------------------|------------------------------|-------------------|------------------------|--------|-------------|--------------------|---------------------------------------------------------------------------------------------------------------------|-------------------------------------------------|------------------------------------------------------------------------------------------|--------------------------------------------------------------------------------------------------------------------------------------------------------------------------------------------------------------------------------------------------------------------------------------------------------------------------------------------------------------------------------------------------------------------|
| First Author ,year                                                                                                                                           | Study name, location  | Age at entry ( range, mean ) | Total sample size | Mean follow-up (years) | Gender | Total cases | Dietary assessment | Outcome assessment                                                                                                  | LA intake                                       | RR (95% CI) (High vs. low intake category)                                               | Adjustments*                                                                                                                                                                                                                                                                                                                                                                                                       |
| Hodge et al, 2007                                                                                                                                            | MCCS, Australia       | 36-72                        | 3,737             | 4                      | M/F    | 346         | Baseline FFQ       | Self-reported confirmed by a doctor                                                                                 | Q5 vs. Q1                                       | 1.41 (0.92 - 2.17)                                                                       | age, sex, country of birth, family history of diabetes, physical activity, alcohol intake, BMI, and waist-hip ratio                                                                                                                                                                                                                                                                                                |
| Patel et al, 2010                                                                                                                                            | EPIC-Norfolk, England | 40-79                        | 383               | 10                     | M/F    | 199         | Baseline FFQ       | self-report of a physician’s diagnosis/ diabetes medication                                                         | T3 vs. T1                                       | 0.72 (0.40 - 1.29)                                                                       | age, sex, family history of diabetes, BMI, smoking status, physical activity, and alcohol intake                                                                                                                                                                                                                                                                                                                   |
| Kroger et al. 2011                                                                                                                                           | EPIC-Potsdam, Germany | 35-65                        | 2,724             | 7                      | M/F    | 673         | Baseline FFQ       | Self-reported/ diabetes medication/dietary treatment                                                                | 3.55 (% energy)<br>4.78<br>5.84<br>6.87<br>8.61 | 1.00<br>0.9 (0.63, 1.28)<br>1.14 (0.80, 1.63)<br>1.08 (0.76, 1.54)<br>1.11 (0.79 - 1.56) | age, sex, BMI, waist circumference, cycling, sports activity, education, smoking status, alcohol intake, occupational activity, coffee intake, fiber intake, total fat intake, and total energy intake                                                                                                                                                                                                             |
| Dow et al. 2016                                                                                                                                              | E3N, France           | 50-75                        | 71,334            | 18                     | F      | 2,610       | Baseline FFQ       | Self-reported/ diabetes medication/dietary treatment/ hospitalization due to diabetes                               | <10·3 (g/d)<br>10·3–13·5<br>≥13·5               | 1.00<br>0.98 (0.89, 1.08)<br>0.97 (0.87 - 1.07)                                          | energy intake, alcohol consumption, education, family history of diabetes, physical activity, hypertension, hypercholesterolemia, smoking status, fatty acid groups, BMI                                                                                                                                                                                                                                           |
| Guasch-Ferre et al. 2017                                                                                                                                     | PREDIMED, Spain       | 55-80                        | 3,339             | 4.3                    | M/F    | 226         | Repeated FFQ       | ADA criteria                                                                                                        | 3.5 (% energy)<br>4.6<br>5.6<br>7.3             | 1.00<br>0.92 (0.61, 1.39)<br>1.45 (0.95, 2.24)<br>1.01 (0.60 - 1.69)                     | age, sex, BMI, smoking status, educational status, leisure-time physical activity, yearly updated total energy intake, alcohol intake, yearly updated quartiles of fiber, protein intake, dietary cholesterol, baseline hypertension or the use of antihypertensive medication, baseline hypercholesterolemia or the use of lipid-lowering drugs, and fasting plasma glucose at baseline, specific subtypes of fat |
| Mirmiran et al. 2018                                                                                                                                         | TLGS, Iran            | 20-70                        | 2,139             | 5.8                    | M/F    | 143         | Baseline FFQ       | Participants who had FPG ≥126 mg/dl, or 2h plasma glucose ≥ 200 mg/dl during OGTT / using anti-diabetic medications | T3 vs. T1                                       | 0.72 (0.36 - 1.42)                                                                       | age, energy intake, total fiber, magnesium, family history of diabetes, baseline SBP                                                                                                                                                                                                                                                                                                                               |
| Zong et al. 2019                                                                                                                                             | NHS, USA              | 30-55                        | 83,648            | 32                     | F      | 9375        | Repeated FFQ       | Self-reported/extra questionnaire                                                                                   | 2.54 (% energy)<br>3.39                         | 1.00<br>0.96 (0.89, 1.02)                                                                | Age, ethnicity, smoking status, alcohol intake, family history of diabetes, menopausal status,                                                                                                                                                                                                                                                                                                                     |

Supplementary data

|                  |            |       |        |    |   |      |              |                                                                                        |                                                 |                                                                                          |                                                                                                                                                                                                                                                                                                                                                     |
|------------------|------------|-------|--------|----|---|------|--------------|----------------------------------------------------------------------------------------|-------------------------------------------------|------------------------------------------------------------------------------------------|-----------------------------------------------------------------------------------------------------------------------------------------------------------------------------------------------------------------------------------------------------------------------------------------------------------------------------------------------------|
|                  |            |       |        |    |   |      |              | e/National Diabetes<br>Data Group criteria                                             | 4.07<br>4.86<br>6.23                            | 0.99 (0.93, 1.07)<br>0.96 (0.89, 1.03)<br>0.98 (0.91 – 1.06)                             | postmenopausal hormone use, physical<br>activity,<br><br>multivitamin use, baseline hypertension,<br>baseline hypercholesterolemia, BMI, total<br>energy intake, intake of fruits and vegetables,<br>fats, trans fats, MUFAs, and other PUFAs                                                                                                       |
| Zong et al. 2019 | NHSII, USA | 25-44 | 88,610 | 22 | F | 5460 | Repeated FFQ | Self-reported/extra<br>questionnaire<br><br>e/National Diabetes<br>Data Group criteria | 3.33 (% energy)<br>4.08<br>4.68<br>5.35<br>6.51 | 1.00<br>0.95 (0.87, 1.04)<br>0.91 (0.82, 1.00)<br>0.94 (0.85, 1.04)<br>0.93 (0.82, 1.05) | Age, ethnicity, smoking status, alcohol intake,<br>family history of diabetes, menopausal status,<br>postmenopausal hormone use, physical<br>activity,<br><br>multivitamin use, baseline hypertension,<br>baseline hypercholesterolemia, BMI, total<br>energy intake, intake of fruits and vegetables,<br>fats, trans fats, MUFAs, and other PUFAs. |
| Zong et al. 2019 | HPFS, USA  | 40-75 | 41,771 | 26 | M | 3607 | Repeated FFQ | Self-reported/extra<br>questionnaire<br><br>e/National Diabetes<br>Data Group criteria | 3.45 (% energy)<br>4.35<br>5.05<br>5.83<br>7.16 | 1.00<br>0.87 (0.78, 0.97)<br>0.88 (0.79, 0.99)<br>0.83 (0.74, 0.94)<br>0.77 (0.67, 0.88) | Age, ethnicity, smoking status, alcohol intake,<br>family history of diabetes, menopausal status,<br>postmenopausal hormone use, physical<br>activity,<br><br>multivitamin use, baseline hypertension,<br>baseline hypercholesterolemia, BMI, total<br>energy intake, intake of fruits and vegetables,<br>fats, trans fats, MUFAs, and other PUFAs  |

**Abbreviations:** CHD; coronary heart disease, HTN; hypertension, IHD; ischemic heart disease, MI; myocardial infarction, FFQ; food frequency questionnaire, HR; Risk ratio, CI; confidence interval, M; male, F; female, Q; quintile or quartile, T; tertile, BMI; body mass index, PUFA; polyunsaturated fatty acid, SFA; saturated fatty acid, US; United States America

| Supplemental Table 4. General characteristics of prospective cohort studies (including nested case-control and case-cohort studies) that investigated the associations between LA biomarkers and risk of type 2 diabetes. |                       |                      |                              |                   |                        |        |             |                                                          |                                                                     |                                                                                                                                                      |                        |                                                      |                                                                                                                                                                                                        |
|---------------------------------------------------------------------------------------------------------------------------------------------------------------------------------------------------------------------------|-----------------------|----------------------|------------------------------|-------------------|------------------------|--------|-------------|----------------------------------------------------------|---------------------------------------------------------------------|------------------------------------------------------------------------------------------------------------------------------------------------------|------------------------|------------------------------------------------------|--------------------------------------------------------------------------------------------------------------------------------------------------------------------------------------------------------|
| First Author ,year                                                                                                                                                                                                        | Study name, location  | Study design         | Age at entry ( range, mean ) | Total sample size | Mean follow-up (years) | Gender | Total cases | Tissue type                                              | Measuring method                                                    | Outcome assessment                                                                                                                                   | Mean/median of LA, %FA | RR (95% CI) (High vs. low intake category)           | Adjustments*                                                                                                                                                                                           |
| Wang et al, 2003                                                                                                                                                                                                          | ARIC , USA            | Cohort               | 53.6                         | 2909              | 9                      | M/F    | 252         | Cholesteryl esters (CE)<br><br>plasma phospholipids (PL) | gas-liquid chromatography (GLC)                                     | self-reported/ diabetes medications/ 8-h<br><br>fasting serum glucose concentration ~ 126 mg/dL/ non-fasting serum glucose concentration ~ 200 mg/dL | 22.03                  | CE: 0.47 (0.29 – 0.73)<br><br>PL: 0.73 (0.50 – 0.99) | age , sex, BMI, waist-to-hip ratio, cigarette-years of smoking , alcohol intake , sports index , education, and parental history of diabetes                                                           |
| Hodge et al. 2007                                                                                                                                                                                                         | MCCS, Australia       | Case-cohort          | 54.8                         | 3737              | 4                      | M/F    | 346         | plasma phospholipids                                     | gas-liquid chromatography with flame ionization detection (GLC-FID) | Self-reported                                                                                                                                        | 20.13                  | 0.33 (0.20 – 0.56)                                   | age, sex, country of birth, family history of diabetes, physical activity, alcohol intake, BMI, and waist-hip ratio                                                                                    |
| Krachler et al. 2008                                                                                                                                                                                                      | VIP, Sweden           | nested case-referent | 51.6                         | 450               | 5.4                    | M/F    | 159         | Erythrocyte membrane                                     | Gas-liquid chromatography (GLC)                                     | WHO criteria                                                                                                                                         | 14.91                  | 0.51 (0.39 – 0.68)                                   | Alcohol intake, dietary fat-intake, BMI, HbA1c                                                                                                                                                         |
| Patel et al, 2010                                                                                                                                                                                                         | EPIC-Norfolk, England | Cohort               | 64                           | 383               | 10                     | M/F    | 199         | Plasma phospholipids<br><br>Erythrocyte membrane         | Gas chromatography with flame ionization detection (GLC-FID)        | Self-reported/ diabetes medication                                                                                                                   | 23.76                  | PL: 0.50 (0.28 – 0.91)<br><br>ER: 0.77 (0.43 – 1.37) | age, sex, family history of diabetes, BMI, smoking status, physical activity, and alcohol intake                                                                                                       |
| Kroger et al. 2011                                                                                                                                                                                                        | EPIC-Potsdam, Germany | nested case-cohort   | 51.2                         | 2,724             | 7                      | M/F    | 673         | Erythrocyte membrane                                     | Gas chromatography with flame ionization detection (GLC-FID)        | Self-reported/ diabetes medication/dietary treatment                                                                                                 | 10.7                   | 0.76 (0.54 – 1.08)                                   | age, sex, BMI, waist circumference, cycling, sports activity, education, smoking status, alcohol intake, occupational activity, coffee intake, fiber intake, total fat intake, and total energy intake |
| Mahendran et al. 2013                                                                                                                                                                                                     | METSIM, Finland       | Cohort               | 57                           | 4335              | 4.5                    | M      | 276         | Total serum                                              | Nuclear magnetic resonance spectroscopy (NMRS)                      | Oral-glucose tolerance test                                                                                                                          | 27.9                   | 0.92 (0.89 – 0.95)                                   | age, BMI, smoking, and physical activity                                                                                                                                                               |

## Supplementary data

|                       |                                         |             |      |       |      |     |        |                                                |                                                             |                                                                                                                                                 |       |                                                      |                                                                                                                                                                                                                                               |
|-----------------------|-----------------------------------------|-------------|------|-------|------|-----|--------|------------------------------------------------|-------------------------------------------------------------|-------------------------------------------------------------------------------------------------------------------------------------------------|-------|------------------------------------------------------|-----------------------------------------------------------------------------------------------------------------------------------------------------------------------------------------------------------------------------------------------|
| Mahendran et al. 2014 | METSIM, Finland                         | Cohort      | 54.9 | 735   | 5    | M   | 30     | Erythrocyte membrane                           | gas chromatography (GC)                                     | Oral-glucose tolerance test                                                                                                                     | 8.3   | 0.54 (0.35 – 0.82)                                   | age, BMI, smoking, and physical activity                                                                                                                                                                                                      |
| Lankinen et al. 2015  | METSIM, Finland                         | Cohort      | 55   | 1301  | 5.9  | M   | 71     | plasma Phospholipids<br><br>cholesteryl esters | gas chromatography (GC)                                     | Oral-glucose tolerance test                                                                                                                     | 18.6  | PL: 0.78 (0.61 – 1.00)<br><br>CE: 0.79 (0.46 – 1.00) | age, BMI, smoking, physical activity and fasting glucose at baseline                                                                                                                                                                          |
| Forouhi et al. 2016   | EPIC-InterAct, eight European countries | Case-cohort | 53.5 | 28051 | 9.8  | M/F | 12,132 | Plasma phospholipids                           | Gas chromatography with flame ionization detection (GC-FID) | Self-reported/ medication use/ hospital admissions                                                                                              | 22.61 | 0.80 (0.77 - 0.83)                                   | age, sex, physical activity, smoking status, education level, BMI, total energy intake, alcohol, intake of meat, fruits, vegetables, dairy products, soft drinks, fish and shellfish, nuts and seeds, vegetable oil, olive oil, and margarine |
| Harris et al. 2016    | WHIMS, USA                              | Cohort      | 70.1 | 6379  | 11   | F   | 703    | Erythrocyte membrane                           | Gas chromatography with flame ionization detection (GC-FID) | Treatment for diabetes with pills or insulin shots                                                                                              | 11.94 | 0.98 (0.90 – 1.06)                                   | age, race, waist circumference, highest education, current smoking status, physical activity, weekly alcohol intake, glycemic load, and family history of diabetes                                                                            |
| Lu et al. 2016        | SCHS, Singapore                         | Cohort      | 55.1 | 394   | 6    | M/F | 197    | Total serum                                    | Gas chromatography-mass spectrometry (GC-MS)                | ADA criteria                                                                                                                                    | -     | 1.44 (1.01 – 2.08)                                   | BMI, smoking status and history of hypertension                                                                                                                                                                                               |
| Takkunen et al. 2016  | DPS, Finland                            | Cohort      | 58.6 | 383   | 11   | M/F | 155    | Total serum                                    | Gas chromatography with flame ionization detection (GC-FID) | Oral-glucose tolerance test                                                                                                                     | 25.2  | 1.26 (1.03 – 1.55)                                   | age, sex, study group, smoking, alcohol intake, waist circumference and physical activity at leisure time, fiber intake, carbohydrate intake, energy intake and serum triglyceride, plasma fasting and 2-h glucose                            |
| Yary et al. 2016      | KIHD, Finland                           | Cohort      | 53.5 | 2189  | 19.3 | M   | 417    | Total serum                                    | Gas chromatography with flame ionization detection (GC-FID) | Self-reported/ physician-diagnosed/ fasting plasma glucose $\geq 7.0$ mmol/L/ 2-h oral-glucose-tolerance test plasma glucose $\geq 11.1$ mmol/L | 26.64 | 0.52 (0.32 – 0.70)                                   | Age, family history of T2D, smoking, education years, leisure-time physical activity, BMI, serum long-chain n–3 PUFAs, and intakes of alcohol and energy                                                                                      |



## Supplementary data

|                        |                         |                         |      |      |     |     |     |                           |                                                             |                                                                                                                |      |                    |                                                                                                                                                                                                                                                      |
|------------------------|-------------------------|-------------------------|------|------|-----|-----|-----|---------------------------|-------------------------------------------------------------|----------------------------------------------------------------------------------------------------------------|------|--------------------|------------------------------------------------------------------------------------------------------------------------------------------------------------------------------------------------------------------------------------------------------|
| Akter et al. 2017      | HHS, Japan              | nested case-control     | 51.3 | 1014 | 5   | M/F | 336 | Total serum               | gas chromatography (GC)                                     | ADA criteria                                                                                                   | 16.5 | 0.80 (0.57 – 1.11) | Age, sex, and month of examination, leisure-time physical activity, occupational physical activity, smoking, alcohol consumption, shift work, sleep duration, family history of diabetes, hypertension, BMI                                          |
| Savolainen et al. 2017 | Gothenburg, Sweden      | Cohort                  | 64   | 399  | 5.5 | F   | 69  | Total serum               | Gas chromatography-mass spectrometry (GC-MS)                | Fasting capillary whole blood glucose measurements                                                             | -    | 0.79 (0.58 – 1.08) | No                                                                                                                                                                                                                                                   |
| Wu et al. 2017         | AGES-Reykjavik, Iceland | prospective cohort (PC) | 75.5 | 753  | 5.2 | M/F | 28  | Plasma phospholipids      | Gas chromatography with flame ionization detection (GC-FID) | Self-reported diabetes/ diabetes medication use/ fasting plasma glucose $\geq 7.0$ mmol/L                      | 17.9 | 0.27 (0.08 – 0.91) | age, sex, race, site of patient recruitment, BMI, education, smoking, physical activity, alcohol intake, prevalent coronary heart disease, treatment for hypertension, treatment for hypercholesterolemia, and biomarker omega-3 PUFA concentrations |
| Wu et al. 2017         | FHS, USA                | prospective cohort (PC) | 64.4 | 1913 | 5.8 | M/F | 98  | Erythrocyte phospholipids | Gas chromatography (GC)                                     | Glucose concentration $\geq 7.0$ mmol/L, HBA1C $\geq 6.5$ / new use of insulin or oral hypoglycemic medication | 11.2 | 0.48 (0.26 – 0.90) | age, sex, race, site of patient recruitment, BMI, education, smoking, physical activity, alcohol intake, prevalent coronary heart disease, treatment for hypertension, treatment for hypercholesterolemia, and biomarker omega-3 PUFA concentrations |
| Wu et al. 2017         | 3C, France              | prospective cohort (PC) | 76.6 | 574  | 8   | M/F | 36  | Erythrocyte phospholipids | Gas chromatography with flame ionization detection (GC-FID) | Self-reported / use of insulin or oral hypoglycemic medication                                                 | 9.6  | 0.51 (0.19 – 1.37) | age, sex, race, site of patient recruitment, BMI, education, smoking, physical activity, alcohol intake, prevalent coronary heart disease, treatment for hypertension, treatment for hypercholesterolemia, and biomarker omega-3 PUFA concentrations |
| Wu et al. 2017         | 3C, France              | prospective cohort (PC) | 74.4 | 1220 | 8   | M/F | 83  | Total plasma              | Gas chromatography with flame ionization detection (GC-FID) | Self-reported / use of insulin or oral hypoglycemic medication                                                 | 25.0 | 0.57 (0.34 – 0.94) | age, sex, race, site of patient recruitment, BMI, education, smoking, physical activity, alcohol intake, prevalent coronary heart disease, treatment for hypertension, treatment for hypercholesterolemia, and biomarker omega-3 PUFA concentrations |

Supplementary data

|                |                  |                                |      |      |      |     |     |                              |                                       |                                                                                                                                                                                                    |      |                    |                                                                                                                                                                                                                                                                                 |
|----------------|------------------|--------------------------------|------|------|------|-----|-----|------------------------------|---------------------------------------|----------------------------------------------------------------------------------------------------------------------------------------------------------------------------------------------------|------|--------------------|---------------------------------------------------------------------------------------------------------------------------------------------------------------------------------------------------------------------------------------------------------------------------------|
| Wu et al. 2017 | CHS, USA         | prospecti<br>ve cohort<br>(PC) | 72.4 | 3179 | 10.6 | M/F | 284 | Plasma<br>phospholipids      | Gas<br>chromatography<br>(GC)         | Fasting glucose<br>concentration<br>≥7.0mmol/L, non-<br>fasting or 2-h<br>postchallenge<br>glucose<br>concentration<br>≥11.1mmol/L/ new<br>use of an insulin or<br>oral hypoglycemic<br>medication | 19.8 | 0.66 (0.46 – 0.95) | age, sex, race, site of patient<br>recruitment, BMI, education,<br>smoking, physical activity,<br>alcohol intake, prevalent<br>coronary heart disease,<br>treatment for hypertension,<br>treatment for<br>hypercholesterolemia, and<br>biomarker omega-3 PUFA<br>concentrations |
| Wu et al. 2017 | PIVUS,<br>Sweden | prospecti<br>ve cohort<br>(PC) | 70.2 | 861  | 10   | M/F | 69  | Plasma<br>phospholipids      | Gas<br>chromatography<br>(GC)         | Fasting plasma<br>glucose ≥<br>7.0mmol/L/ self-<br>reported/ medical<br>records/ use of<br>insulin or oral<br>hypoglycemic<br>agents                                                               | 19.6 | 0.70 (0.26 – 1.86) | age, sex, race, site of patient<br>recruitment, BMI, education,<br>smoking, physical activity,<br>alcohol intake, prevalent<br>coronary heart disease,<br>treatment for hypertension,<br>treatment for<br>hypercholesterolemia, and<br>biomarker omega-3 PUFA<br>concentrations |
| Wu et al. 2017 | PIVUS,<br>Sweden | prospecti<br>ve cohort<br>(PC) | 70.2 | 822  | 10   | M/F | 67  | Cholesterol<br>esters        | Gas<br>chromatography<br>(GC)         | Fasting plasma<br>glucose ≥<br>7.0mmol/L/ self-<br>reported/ medical<br>records/ use of<br>insulin or oral<br>hypoglycemic<br>agents                                                               | 48.2 | 0.80 (0.34 – 1.87) | age, sex, race, site of patient<br>recruitment, BMI, education,<br>smoking, physical activity,<br>alcohol intake, prevalent<br>coronary heart disease,<br>treatment for hypertension,<br>treatment for<br>hypercholesterolemia, and<br>biomarker omega-3 PUFA<br>concentrations |
| Wu et al. 2017 | HPFS, USA        | prospecti<br>ve cohort<br>(PC) | 64.7 | 1545 | 14.8 | M   | 113 | Erythrocyte<br>phospholipids | Gas-liquid<br>chromatography<br>(GLC) | Self-reports and<br>confirmed by<br>National Diabetes<br>Data Group criteria                                                                                                                       | 12.9 | 0.81 (0.58 – 1.15) | age, sex, race, site of patient<br>recruitment, BMI, education,<br>smoking, physical activity,<br>alcohol intake, prevalent<br>coronary heart disease,<br>treatment for hypertension,<br>treatment for<br>hypercholesterolemia, and<br>biomarker omega-3 PUFA<br>concentrations |
| Wu et al. 2017 | HPFS, USA        | prospecti<br>ve cohort<br>(PC) | 64.6 | 1497 | 14.8 | M   | 109 | Total plasma                 | Gas-liquid<br>chromatography<br>(GLC) | Self-reports and<br>confirmed by<br>National Diabetes<br>Data Group criteria                                                                                                                       | 30.3 | 0.42 (0.26 – 0.69) | age, sex, race, site of patient<br>recruitment, BMI, education,<br>smoking, physical activity,<br>alcohol intake, prevalent<br>coronary heart disease,<br>treatment for hypertension,<br>treatment for<br>hypercholesterolemia, and<br>biomarker omega-3 PUFA<br>concentrations |
| Wu et al. 2017 | NHS, USA         | prospecti<br>ve cohort<br>(PC) | 60.4 | 1500 | 20.2 | F   | 154 | Erythrocyte<br>phospholipids | Gas-liquid<br>chromatography<br>(GLC) | Self-reports and<br>confirmed by<br>National Diabetes<br>Data Group criteria                                                                                                                       | 12.1 | 1.15 (0.77 – 1.70) | age, sex, race, site of patient<br>recruitment, BMI, education,<br>smoking, physical activity,<br>alcohol intake, prevalent<br>coronary heart disease,<br>treatment for hypertension,<br>treatment for<br>hypercholesterolemia, and                                             |

Supplementary data

|                |                  |                               |      |      |      |     |     |                    |                                                                     |                                                                                                                                                                                                        |      |                    |                                                                                                                                                                                                                                                      |
|----------------|------------------|-------------------------------|------|------|------|-----|-----|--------------------|---------------------------------------------------------------------|--------------------------------------------------------------------------------------------------------------------------------------------------------------------------------------------------------|------|--------------------|------------------------------------------------------------------------------------------------------------------------------------------------------------------------------------------------------------------------------------------------------|
|                |                  |                               |      |      |      |     |     |                    |                                                                     |                                                                                                                                                                                                        |      |                    | biomarker omega-3 PUFA concentrations                                                                                                                                                                                                                |
| Wu et al. 2017 | NHS, USA         | prospecti<br>ve cohort<br>(PC | 60.4 | 1595 | 20.2 | F   | 159 | Total plasma       | Gas-liquid chromatography (GLC)                                     | Self-reports and confirmed by National Diabetes Data Group criteria                                                                                                                                    | 29.0 | 0.44 (0.30 – 0.64) | age, sex, race, site of patient recruitment, BMI, education, smoking, physical activity, alcohol intake, prevalent coronary heart disease, treatment for hypertension, treatment for hypercholesterolemia, and biomarker omega-3 PUFA concentrations |
| Wu et al. 2017 | IRAS, USA        | prospecti<br>ve cohort<br>(PC | 55.1 | 719  | 5    | M/F | 146 | Total plasma       | Gas chromatography with flame ionization detection (GC-FID)         | Fasting glucose concentration ≥ 7.0mmol/L/ 2-hour post-oral glucose concentration ≥ 11.1mmol/L/ new use of insulin or oral hypoglycemic medication./ Fasting or non-fasting HbA1C concentration ≥ 6.5% | 30.2 | 0.56 (0.33 – 0.95) | age, sex, race, site of patient recruitment, BMI, education, smoking, physical activity, alcohol intake, prevalent coronary heart disease, treatment for hypertension, treatment for hypercholesterolemia, and biomarker omega-3 PUFA concentrations |
| Wu et al. 2017 | CCCC, Taiwan     | prospecti<br>ve cohort<br>(PC | 59.2 | 616  | 6    | M/F | 128 | Total plasma       | Gas chromatography with flame ionization detection (GC-FID)         | Fasting glucose levels ≥ 7.0mmol/L / use of hypoglycemic medication                                                                                                                                    | 16.1 | 1.03 (0.62 – 1.69) | age, sex, race, site of patient recruitment, BMI, education, smoking, physical activity, alcohol intake, prevalent coronary heart disease, treatment for hypertension, treatment for hypercholesterolemia, and biomarker omega-3 PUFA concentrations |
| Wu et al. 2017 | ULSAM-50, Sweden | prospecti<br>ve cohort<br>(PC | 49.7 | 1891 | 21.4 | M   | 332 | Cholesterol esters | gas-liquid chromatography with flame ionization detection (GLC-FID) | Fasting plasma glucose ≥ 7.0mmol/L/ use of glucose-lowering medication                                                                                                                                 | 54.0 | 0.57 (0.41 – 0.79) | age, sex, race, site of patient recruitment, BMI, education, smoking, physical activity, alcohol intake, prevalent coronary heart disease, treatment for hypertension, treatment for hypercholesterolemia, and biomarker omega-3 PUFA concentrations |
| Wu et al. 2017 | ULSAM-70, Sweden | prospecti<br>ve cohort<br>(PC | 71   | 738  | 14.1 | M   | 99  | Adipose tissue     | gas-liquid chromatography (GLC)                                     | Fasting plasma glucose ≥ 7.0mmol/L/ use of glucose-lowering medication                                                                                                                                 | 12.6 | 0.82 (0.49 – 1.35) | age, sex, race, site of patient recruitment, BMI, education, smoking, physical activity, alcohol intake, prevalent coronary heart disease, treatment for hypertension, treatment for hypercholesterolemia, and                                       |

Supplementary data

|                        |                                        |        |       |       |      |     |     |                      |                                                             |                                                                                  |             |                    |                                                                                                                                                                                                                        |
|------------------------|----------------------------------------|--------|-------|-------|------|-----|-----|----------------------|-------------------------------------------------------------|----------------------------------------------------------------------------------|-------------|--------------------|------------------------------------------------------------------------------------------------------------------------------------------------------------------------------------------------------------------------|
|                        |                                        |        |       |       |      |     |     |                      |                                                             |                                                                                  |             |                    | biomarker omega-3 PUFA concentrations                                                                                                                                                                                  |
| Ahola-Olli et al. 2019 | Pooled analysis of four finish cohorts | Cohort | 33.5  | 11896 | 8-15 | M/F | 392 | Total serum          | gas chromatography (GC)                                     | Nationwide register data                                                         | 3.18 mmol/l | 0.75 (0.68 – 0.83) | sex, baseline age, BMI and fasting glucose                                                                                                                                                                             |
| Miao et al. 2020       | GNHS, China                            | Cohort | 58.1  | 2731  | 6.2  | M/F | 276 | Erythrocyte membrane | gas chromatography (GC)                                     | ADA criteria                                                                     | 9.81        | 0.98 (0.72 – 1.33) | age, sex, BMI, WHR, education, household income, smoking and alcohol drinking status, physical activity, total energy intake, and family history of diabetes, baseline erythrocyte total n-3 PUFAs and fasting glucose |
| Weir et al. 2020       | MESA, USA                              | Cohort | 45-84 | 5508  | 8.6  | M/F | 635 | Plasma Phospholipids | Gas chromatography with flame ionization detection (GC-FID) | Physician diagnosis/ use of anti-diabetes medications/ fasting glucose>126 mg/dL | 20.7        | 0.67 (0.43 – 0.86) | age, race/ethnicity, gender, waist circumference, education level, hypertension medication use, cigarette smoking, alcohol intake, and HOMA-IR                                                                         |

**Abbreviations:** CHD; coronary heart disease, HTN; hypertension, IHD; ischemic heart disease, MI; myocardial infarction, FFQ; food frequency questionnaire, RR; Risk ratio, CI; confidence interval, M; male, F; female, Q; quintile or quartile, T; tertile, BMI; body mass index, PUFA; polyunsaturated fatty acid, USA; United States of America

ARIC: Atherosclerosis Risk in Communities Study, MCCS: Melbourne Collaborative Cohort Study, VIP: Vasterbotten Intervention Program, EPIC-Norfolk: European Prospective Investigation into Cancer (Norfolk), EPIC-Potsdam: European Prospective Investigation into Cancer (Potsdam), METSIM: Metabolic Syndrome in Men Study, HCS: Hunter Community Study, EPIC-InterAct: European Prospective Investigation into Cancer and Nutrition (InterAct), WHIMS: Women’s health initiative memory study, SCHS: Singapore Chinese Health Study, DPS: Diabetes Prevention Study, KIID: Kuopio Ischemic Heart Disease Risk Factor Study, HHS: Hitachi Health Study, AGES-Reykjavik: Age, Gene/Environment Susceptibility Study (Reykjavik), FHS: Framingham Heart Study, 3C Study: Three-City Study, CHS: Cardiovascular Health Study, PIVUS: Prospective Investigation of the Vasculature in Uppsala Seniors, HPFS: Health Professionals Follow-up Study, NHS: Nurses’ Health Study, IRAS: Insulin Resistance Atherosclerosis Study, CCCC: ChinShan Community Cardiovascular study, ULSAM 50 & 70: Uppsala Longitudinal Study of Adult Men, GNHS: Guangzhou Nutrition and Health Study, MESA: Multi-Ethnic Study of Atherosclerosis

## Supplementary data

| <b>Supplemental Table 5.</b> Quality assessment for studies included the meta-analysis of LA and the risk of type 2 diabetes (Newcastle-Ottawa Scale). |                   |           |     |     |     |               |     |         |     |     |       |         |
|--------------------------------------------------------------------------------------------------------------------------------------------------------|-------------------|-----------|-----|-----|-----|---------------|-----|---------|-----|-----|-------|---------|
| Cohort                                                                                                                                                 | Study             | Selection |     |     |     | Comparability |     | Outcome |     |     | Score | Quality |
|                                                                                                                                                        |                   | (1)       | (2) | (3) | (4) | (1)           | (2) | (1)     | (2) | (3) |       |         |
| <b>Studies reported dietary LA intake and type 2 diabetes</b>                                                                                          |                   |           |     |     |     |               |     |         |     |     |       |         |
| E3N                                                                                                                                                    | Dow 2016          | *         | *   | *   | *   | *             |     | *       | *   | *   | 8     | High    |
| PREDIMED                                                                                                                                               | Guasch-Ferre 2017 |           | *   | *   | *   | *             | *   | *       | *   | *   | 8     | High    |
| TLGS                                                                                                                                                   | Mirmiran 2018     | *         | *   | *   | *   | *             |     | *       | *   | *   | 8     | High    |
| NHS                                                                                                                                                    | Zong 2019         |           | *   | *   | *   | *             | *   | *       | *   | *   | 8     | High    |
| NHSII                                                                                                                                                  | Zong 2019         |           | *   | *   | *   | *             | *   | *       | *   | *   | 8     | High    |
| HPFS                                                                                                                                                   | Zong 2019         |           | *   | *   | *   | *             | *   | *       | *   | *   | 8     | High    |
| <b>Studies reported dietary intake and biomarkers of LA and type 2 diabetes</b>                                                                        |                   |           |     |     |     |               |     |         |     |     |       |         |
| MCCS                                                                                                                                                   | Hodge 2007        | *         | *   | *   | *   | *             |     | *       |     | *   | 7     | High    |
| EPIC-Norfolk                                                                                                                                           | Patel 2010        | *         | *   | *   | *   | *             |     | *       | *   | *   | 8     | High    |
| EPIC-Potsdam                                                                                                                                           | Kroger 2011       | *         | *   | *   | *   | *             | *   | *       | *   | *   | 9     | High    |
| <b>Studies reported biomarkers of LA and type 2 diabetes</b>                                                                                           |                   |           |     |     |     |               |     |         |     |     |       |         |
| ARIC                                                                                                                                                   | Wang 2003         | *         | *   | *   | *   | *             | *   | *       | *   |     | 8     | High    |
| VIP                                                                                                                                                    | Krachler 2008     | *         | *   | *   | *   | *             |     | *       | *   |     | 7     | High    |
| METSIM                                                                                                                                                 | Mahendran 2013    | *         | *   | *   | *   | *             |     | *       | *   | *   | 8     | High    |
| METSIM                                                                                                                                                 | Mahendran 2014    | *         | *   | *   | *   | *             |     | *       | *   |     | 7     | High    |
| METSIM                                                                                                                                                 | Lankinen 2015     | *         | *   | *   | *   | *             |     | *       | *   |     | 7     | High    |

## Supplementary data

[illegible]

## Supplementary data

[illegible]

| <b>Supplementary Table 6.</b> Relative risks from non-linear dose-response analysis of LA intake and type 2 diabetes (% of energy) |                  |
|------------------------------------------------------------------------------------------------------------------------------------|------------------|
| LA intake (% of energy)                                                                                                            | RR (95% CI)      |
| 2.5                                                                                                                                | 1.00 (1.00-1.00) |
| 3                                                                                                                                  | 0.99 (0.98-1.00) |
| 3.5                                                                                                                                | 0.98 (0.95-1.00) |
| 4                                                                                                                                  | 0.97 (0.93-1.00) |
| 4.5                                                                                                                                | 0.95 (0.91-1.00) |
| 5                                                                                                                                  | 0.95 (0.90-1.00) |
| 5.5                                                                                                                                | 0.94 (0.89-0.99) |
| 6                                                                                                                                  | 0.93 (0.88-0.98) |
| 6.5                                                                                                                                | 0.92 (0.87-0.98) |
| 7                                                                                                                                  | 0.92 (0.85-0.99) |
| 7.5                                                                                                                                | 0.91 (0.84-0.99) |
| 8                                                                                                                                  | 0.90 (0.82-1.00) |
| 8.5                                                                                                                                | 0.90 (0.80-1.00) |



## Supplementary data

**Supplementary Table 7.** Scoring for the different components of the NutriGrade.

| <b>Exposure</b>                    | <b>Outcome</b>  | <b>Comparison</b> | <b>Risk of bias</b> | <b>Precision</b> | <b>Heterogeneity</b> | <b>Directness</b> | <b>Publication bias</b> | <b>Funding bias</b> | <b>Effect size</b> | <b>Dose-response</b> | <b>Sum</b> | <b>NutriGrade</b> |
|------------------------------------|-----------------|-------------------|---------------------|------------------|----------------------|-------------------|-------------------------|---------------------|--------------------|----------------------|------------|-------------------|
| <b>Dietary linoleic acid</b>       | Type 2 diabetes | Per 10% energy    | 2                   | 1                | 0.3                  | 1                 | 0.5                     | 1                   | 0                  | 1                    | 6.8        | Moderate          |
| <b>Biomarkers of linoleic acid</b> | Type 2 diabetes | Per SD increment  | 2                   | 1                | 0.4                  | 1                 | 1                       | 1                   | 0                  | 0                    | 6.4        | Moderate          |

**Supplementary Table 8.** Subgroup analyses of dietary linoleic acid intake in relation to risk of type 2 diabetes.

|                                   |     | <i>n</i> | RR (95%CI)        | <i>I</i> <sup>2</sup> (%), | P <sub>h</sub> <sup>1</sup> | P <sub>h</sub> <sup>2</sup> |
|-----------------------------------|-----|----------|-------------------|----------------------------|-----------------------------|-----------------------------|
| All studies                       |     | 9        | 0.94 (0.90, 0.99) | 48.5                       | 0.05                        |                             |
| <b>Gender</b>                     |     |          |                   |                            |                             |                             |
| Men                               |     | 1        | 0.77 (0.67, 0.88) | -                          |                             | 0.02                        |
| Women                             |     | 3        | 0.96 (0.91, 1.02) | 0.0                        | 0.77                        |                             |
| Both                              |     | 5        | 1.05 (0.85, 1.29) | 14.8                       | 0.32                        |                             |
| <b>Geographic region</b>          |     |          |                   |                            |                             |                             |
| US                                |     | 3        | 0.92 (0.87, 0.98) | 78.2                       | 0.01                        | 0.23                        |
| Europe                            |     | 4        | 0.97 (0.88, 1.07) | 0.0                        | 0.65                        |                             |
| Asia & Australia                  |     | 2        | 1.16 (0.81, 1.68) | 62.3                       | 0.10                        |                             |
| <b>Follow-up duration</b>         |     |          |                   |                            |                             |                             |
| <10 years                         |     | 4        | 1.11 (0.88, 1.39) | 0.0                        | 0.41                        | 0.19                        |
| ≥10 years                         |     | 5        | 0.93 (0.89, 0.98) | 61.9                       | 0.03                        |                             |
| <b>Number of cases</b>            |     |          |                   |                            |                             |                             |
| <1000                             |     |          | 1.05 (0.85, 1.29) | 14.8                       | 0.32                        | 0.36                        |
| >1000                             |     |          | 0.93 (0.89, 0.98) | 69.2                       | 0.02                        |                             |
| <b>Dietary assessment</b>         |     |          |                   |                            |                             |                             |
| Baseline FFQ                      |     | 5        | 0.98 (0.89, 1.08) | 22.3                       | 0.27                        | 0.35                        |
| Repeated FFQ                      |     | 4        | 0.92 (0.87, 0.98) | 67.6                       | 0.02                        |                             |
| <b>Adjustment for confounders</b> |     |          |                   |                            |                             |                             |
| Energy intake                     | Yes | 7        | 0.94 (0.89,0.99)  | 47.0                       | 0.08                        | 0.42                        |
|                                   | No  | 2        | 1.11 (0.79, 1.57) | 69.6                       | 0.07                        |                             |
| Physical activity                 | Yes | 7        | 0.94 (0.89, 0.99) | 57.3                       | 0.03                        | 0.70                        |
|                                   | No  | 2        | 1.01 (0.75, 1.38) | 18.5                       | 0.27                        |                             |
| Smoking status                    | Yes | 7        | 0.94 (0.89, 0.99) | 48.0                       | 0.07                        | 0.33                        |
|                                   | No  | 2        | 1.16 (0.81, 1.70) | 62.3                       | 0.10                        |                             |
| Fiber intake                      | Yes | 3        | 1.01 (0.78, 1.32) | 0.0                        | 0.54                        | 0.64                        |
|                                   | No  | 6        | 0.94 (0.89, 0.99) | 64.2                       | 0.01                        |                             |
| Trans fat intake                  | Yes | 5        | 0.94 (0.89, 0.99) | 59.3                       | 0.04                        | 0.38                        |
|                                   | No  | 4        | 1.06 (0.84, 1.33) | 35.7                       | 0.20                        |                             |
| Family history of diabetes        | Yes | 7        | 0.94 (0.89, 0.99) | 58.8                       | 0.02                        | 0.41                        |
|                                   | No  | 2        | 1.08 (0.81, 1.43) | 0.0                        | 0.76                        |                             |

<sup>1</sup>P for heterogeneity within each subgroup<sup>2</sup>P for heterogeneity between subgroups with meta-regression analysis

## Supplementary data

| <b>Supplementary Table 9.</b> Subgroup analyses of linoleic acid biomarkers in relation to risk of type 2 diabetes. |     |          |                   |                           |                                  |                                  |
|---------------------------------------------------------------------------------------------------------------------|-----|----------|-------------------|---------------------------|----------------------------------|----------------------------------|
|                                                                                                                     |     | <i>n</i> | <b>RR (95%CI)</b> | <i>I</i> <sup>2</sup> (%) | <b>P<sub>h</sub><sup>1</sup></b> | <b>P<sub>h</sub><sup>2</sup></b> |
| All studies                                                                                                         |     | 27       | 0.83 (0.81, 0.85) | 70.6                      | 0.001                            |                                  |
| <b>Tissue types</b>                                                                                                 |     |          |                   |                           |                                  |                                  |
| Adipose tissue                                                                                                      |     | 1        | 0.89 (0.66, 1.20) | -                         |                                  | 0.29                             |
| Erythrocytes                                                                                                        |     | 10       | 0.91 (0.86, 0.96) | 72.3                      | 0.001                            |                                  |
| Phospholipids                                                                                                       |     | 9        | 0.80 (0.77, 0.83) | 48.7                      | 0.05                             |                                  |
| Total serum or plasma                                                                                               |     | 12       | 0.80 (0.75, 0.84) | 77.1                      | 0.001                            |                                  |
| Cholesteryl esters                                                                                                  |     | 4        | 0.74 (0.65, 0.82) | 0.0                       | 0.78                             |                                  |
| <b>Gender</b>                                                                                                       |     |          |                   |                           |                                  |                                  |
| Men                                                                                                                 |     | 5        | 0.77 (0.70, 0.85) | 36.6                      | 0.17                             | 0.68                             |
| Women                                                                                                               |     | 3        | 0.98 (0.91, 1.05) | 19.3                      | 0.29                             |                                  |
| Both                                                                                                                |     | 19       | 0.81 (0.79, 0.84) | 69.1                      | 0.001                            |                                  |
| <b>Geographic region</b>                                                                                            |     |          |                   |                           |                                  |                                  |
| US                                                                                                                  |     | 8        | 0.91 (0.86, 0.96) | 49.9                      | 0.05                             | 0.89                             |
| Europe                                                                                                              |     | 14       | 0.80 (0.77, 0.83) | 70.0                      | 0.001                            |                                  |
| Asia & Australia                                                                                                    |     | 5        | 0.88 (0.80, 0.96) | 69.8                      | 0.03                             |                                  |
| <b>Follow-up duration</b>                                                                                           |     |          |                   |                           |                                  |                                  |
| <10 years                                                                                                           |     | 16       | 0.81 (0.79, 0.84) | 64.1                      | 0.001                            | 0.24                             |
| ≥10 years                                                                                                           |     | 11       | 0.83 (0.81, 0.85) | 75                        | 0.001                            |                                  |
| <b>Number of cases</b>                                                                                              |     |          |                   |                           |                                  |                                  |
| <250                                                                                                                |     | 16       | 0.88 (0.81, 0.95) | 68.9                      | 0.01                             | 0.89                             |
| 250-500                                                                                                             |     | 7        | 0.80 (0.75, 0.84) | 58.1                      | 0.02                             |                                  |
| >500                                                                                                                |     | 4        | 0.83 (0.81, 0.86) | 85.9                      | 0.01                             |                                  |
| <b>Adjustment for confounders</b>                                                                                   |     |          |                   |                           |                                  |                                  |
| Energy intake                                                                                                       | Yes | 5        | 0.82 (0.79, 0.84) | 82.3                      | 0.001                            | 0.25                             |
|                                                                                                                     | No  | 22       | 0.85 (0.81, 0.88) | 67.2                      | 0.001                            |                                  |
| Physical activity                                                                                                   | Yes | 21       | 0.84 (0.81, 0.86) | 70.7                      | 0.001                            | 0.50                             |
|                                                                                                                     | No  | 6        | 0.80 (0.75, 0.85) | 73.3                      | 0.002                            |                                  |
| Smoking status                                                                                                      | Yes | 23       | 0.85 (0.82, 0.87) | 66.5                      | 0.001                            | 0.01                             |
|                                                                                                                     | No  | 4        | 0.71 (0.66, 0.77) | 59.6                      | 0.06                             |                                  |
| BMI                                                                                                                 | Yes | 23       | 0.81 (0.78, 0.83) | 58.3                      | 0.001                            | 0.08                             |
|                                                                                                                     | No  | 4        | 0.96 (0.90, 1.03) | 74.5                      | 0.008                            |                                  |
| Alcohol drinking                                                                                                    | Yes | 23       | 0.84 (0.81, 0.86) | 71.5                      | 0.001                            | 0.50                             |
|                                                                                                                     | No  | 4        | 0.76 (0.69, 0.83) | 58.7                      | 0.06                             |                                  |
| Family history of diabetes                                                                                          | Yes | 6        | 0.90 (0.85, 0.95) | 72.7                      | 0.003                            | 0.69                             |

## Supplementary data

|                                                                                  |    |    |                   |      |       |  |
|----------------------------------------------------------------------------------|----|----|-------------------|------|-------|--|
|                                                                                  | No | 21 | 0.81 (0.79, 0.84) | 67.5 | 0.001 |  |
| <sup>1</sup> P for heterogeneity within each subgroup                            |    |    |                   |      |       |  |
| <sup>2</sup> P for heterogeneity between subgroups with meta-regression analysis |    |    |                   |      |       |  |

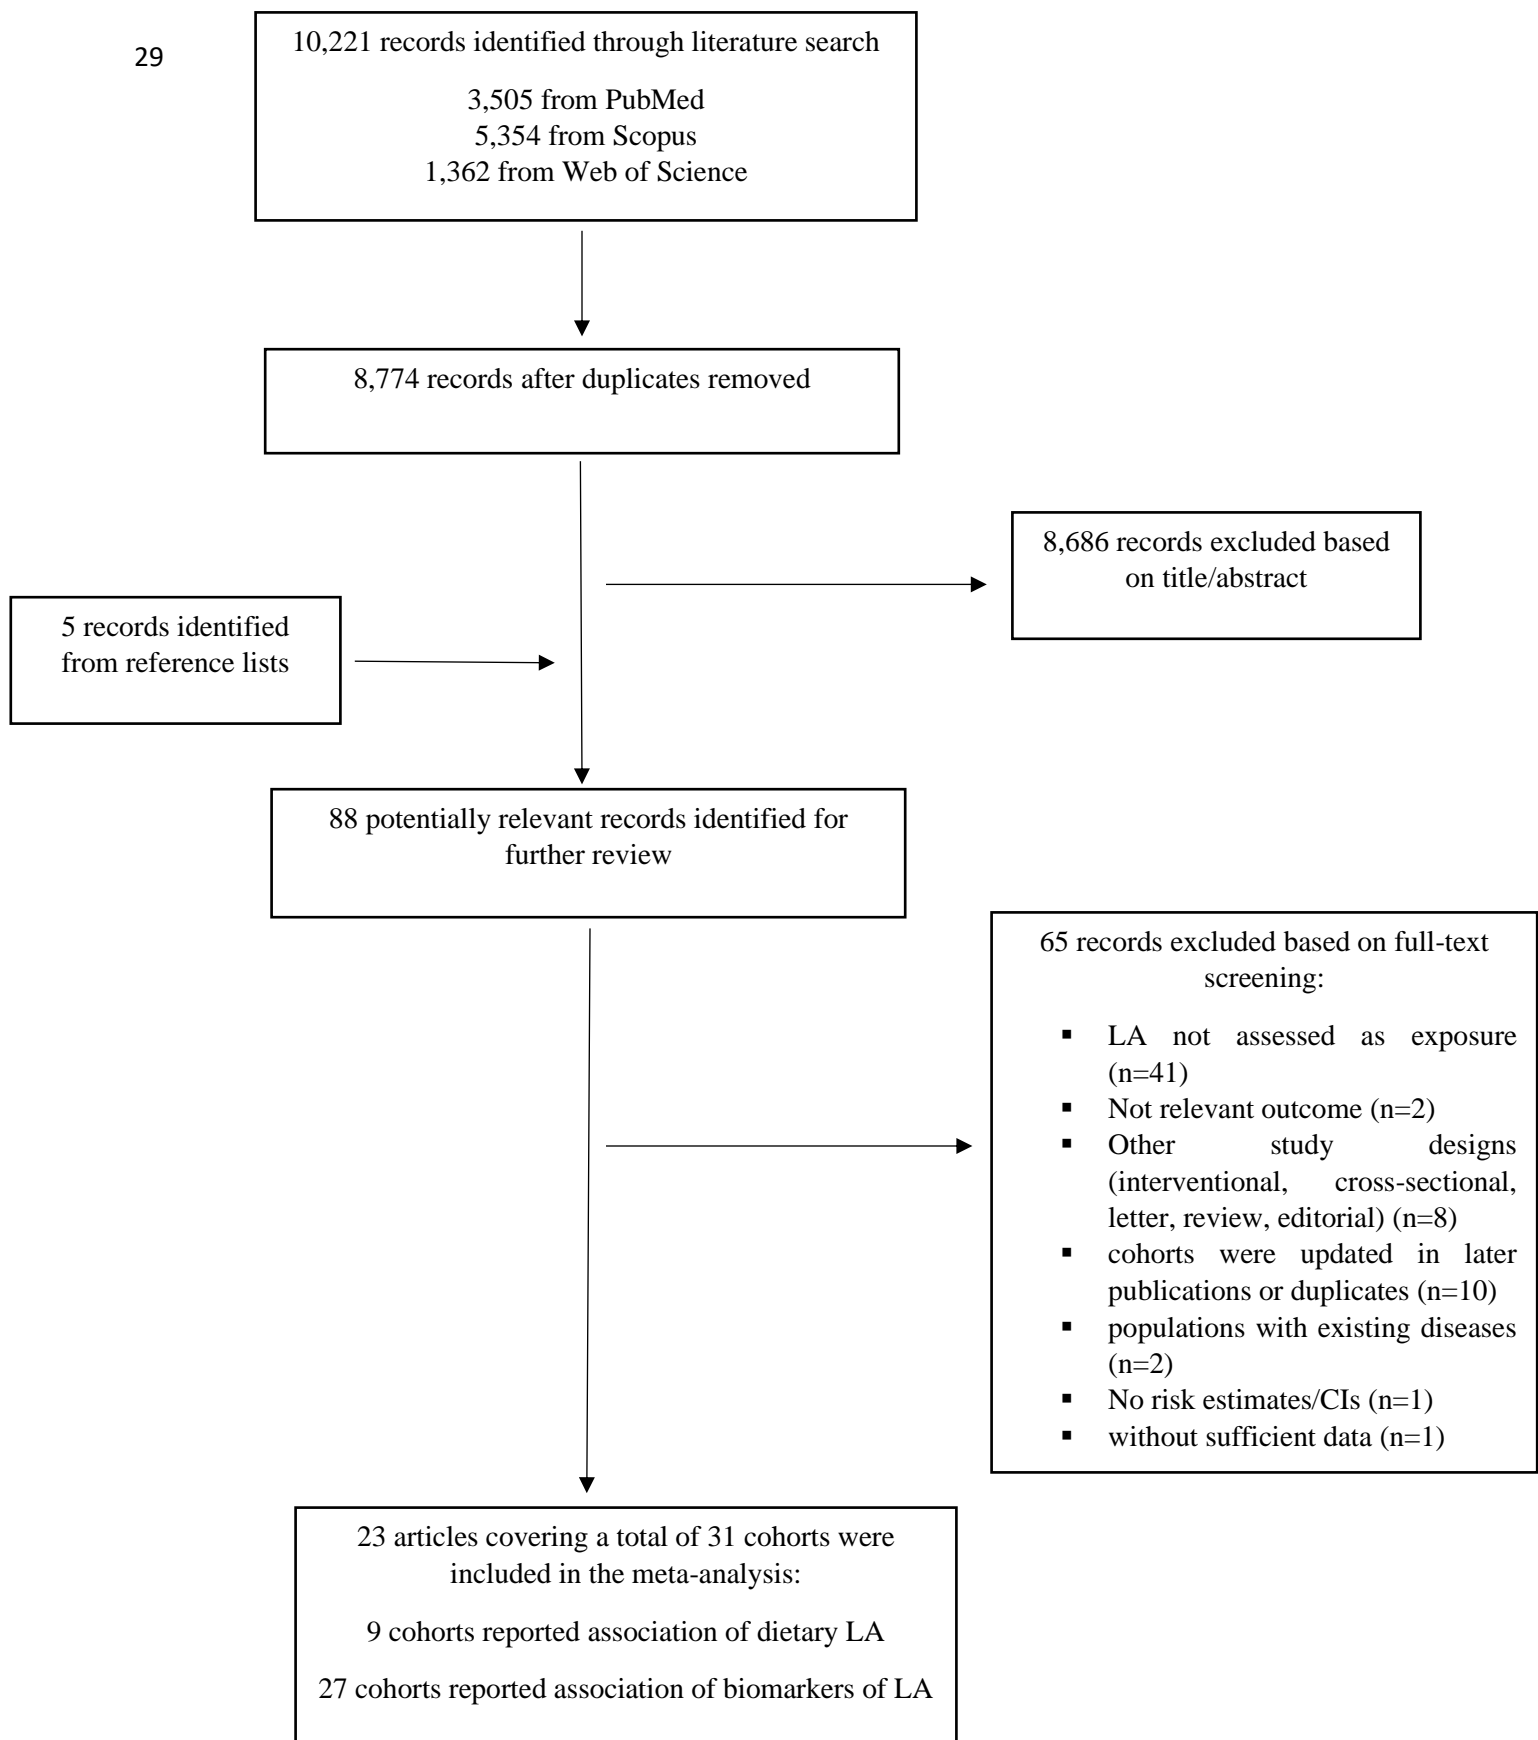

**Supplemental Figure 1.** Flow diagram of study selection process. LA; linoleic acid

## Supplementary data

**Supplemental Figure 2.** Leave-one-out sensitivity analysis of the association between LA intake and risk of type 2 diabetes.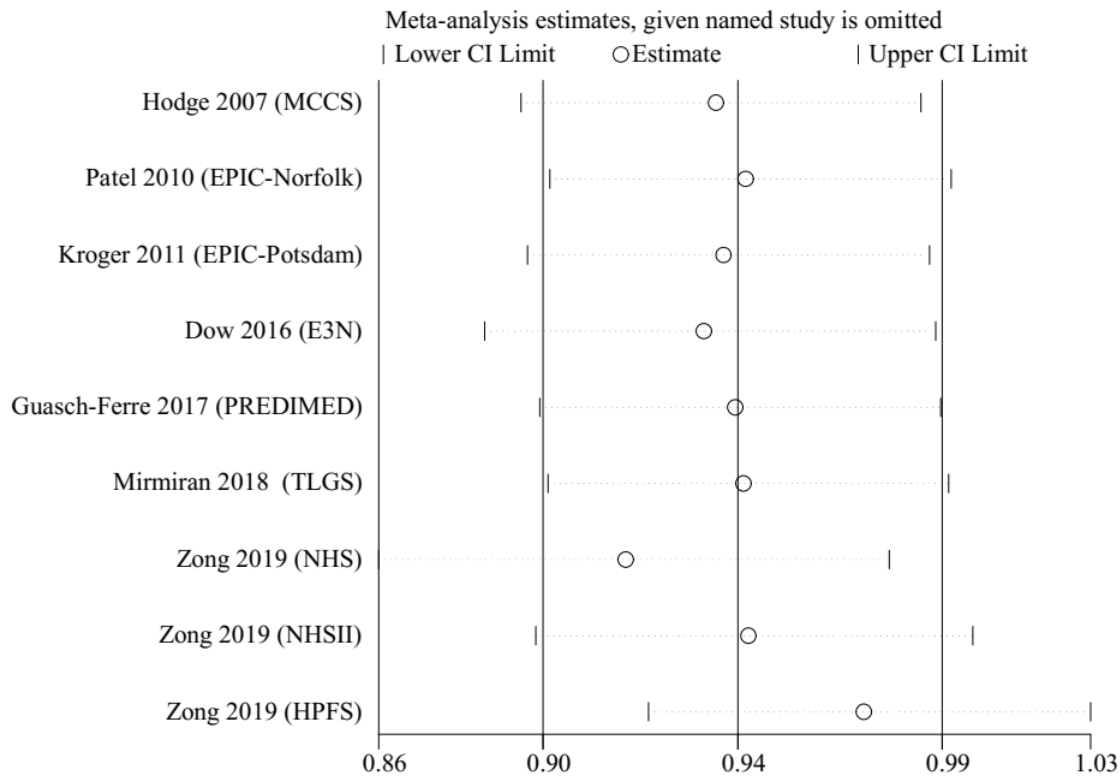

| Study omitted                | Estimate           | [95% Conf. Interval] |                  |
|------------------------------|--------------------|----------------------|------------------|
| Hodge 2007 (MCCS)            | 0.93771207         | 0.89208478           | 0.98567307       |
| Patel 2010 (EPIC-Norfolk)    | 0.94466263         | 0.89883679           | 0.99282491       |
| Kroger 2011 (EPIC-Potsdam)   | 0.93949765         | 0.89360452           | 0.98774779       |
| Dow 2016 (E3N)               | 0.93488795         | 0.88358289           | 0.98917198       |
| Guasch-Ferre 2017 (PREDIMED) | 0.94222748.        | 0.89647484           | 0.99031514       |
| Mirmiran 2018 (TLGS)         | 0.94416046         | 0.89840269           | 0.99224877       |
| Zong 2019 (NHS)              | 0.91660023         | 0.8587774            | 0.97831643       |
| Zong 2019 (NHSII)            | 0.94530207         | 0.89553595           | 0.99783373       |
| <b>Zong 2019 (HPFS)</b>      | <b> 0.97233933</b> | <b>0.92197621</b>    | <b>1.0254536</b> |
| Combined                     | 0.94282697         | 0.89725019           | 0.99071888       |

Supplementary data

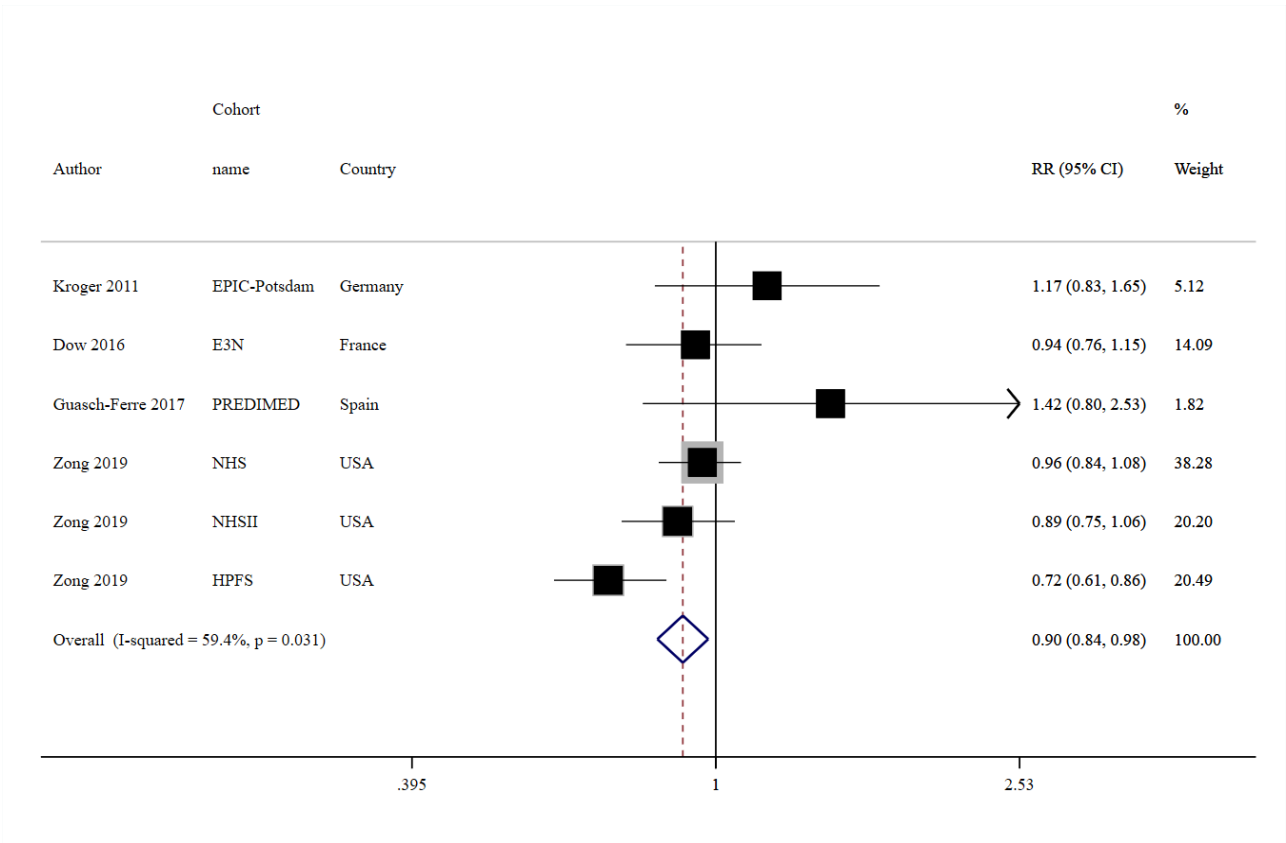

**Supplemental Figure 3.** Relative risk of T2DM for a 5% increase in energy intake form linoleic acid

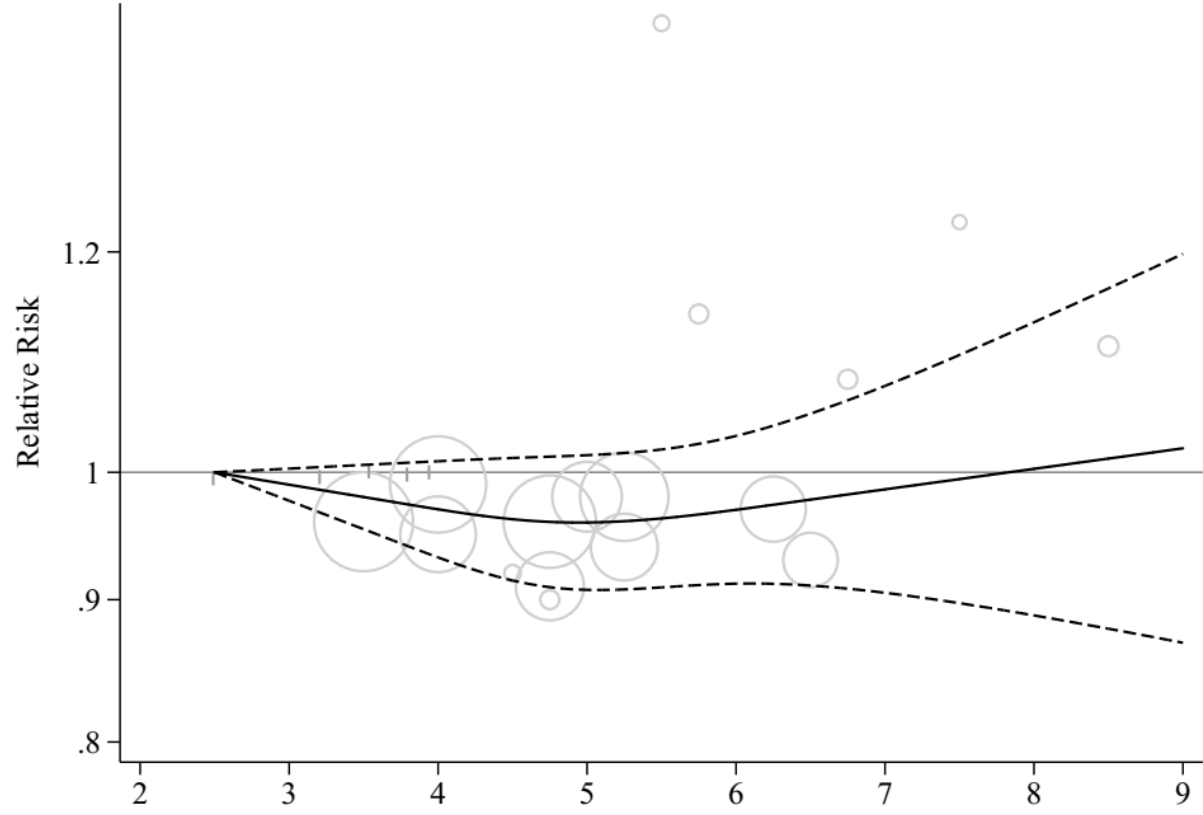

**Supplemental Figure 4.** Nonlinear dose-response association between linoleic acid intake and the risk of type 2 diabetes (with the exclusion of HPFS study). P for nonlinearity was 0.22, and P for linearity was 0.37. Solid line represents non-linear dose response and dotted lines represent 95% confidence interval. Circles represent relative risk point estimates for LA intake categories from each study with circle size proportional to inverse of standard error. Small vertical grey lines are baseline LA intake categories in each study

| Relative risks from non-linear dose-response analysis of LA intake and type 2 diabetes (with the exclusion of HPFS study) |                     |
|---------------------------------------------------------------------------------------------------------------------------|---------------------|
| LA intake (% of energy)                                                                                                   | RR (95% CI)         |
| 2.5                                                                                                                       | 1.00 (1.00 to 1.00) |
| 3                                                                                                                         | 0.99 (0.98 to 1.00) |
| 3.5                                                                                                                       | 0.98 (0.95 to 1.01) |



## Supplementary data

|     |                      |
|-----|----------------------|
| 4   | 0.97 (0.93 to 1.01)  |
| 4.5 | 0.96 (0.91 to 1.01)  |
| 5   | 0.96 (0.91 to 1.01)  |
| 5.5 | 0.96 (0.91 to 1.02)  |
| 6   | 0.97 ( 0.91 to 1.03) |
| 6.5 | 0.98 (0.91 to 1.05)  |
| 7   | 0.99 (0.91 to 1.07)  |
| 7.5 | 0.99 (0.90 to 1.10)  |
| 8   | 1.00 (0.89 to 1.13)  |
| 8.5 | 1.01 (0.88 to 1.16)  |

**Supplemental Figure 5.** Leave-one-out sensitivity analysis of the association between LA biomarkers and risk of type 2 diabetes.

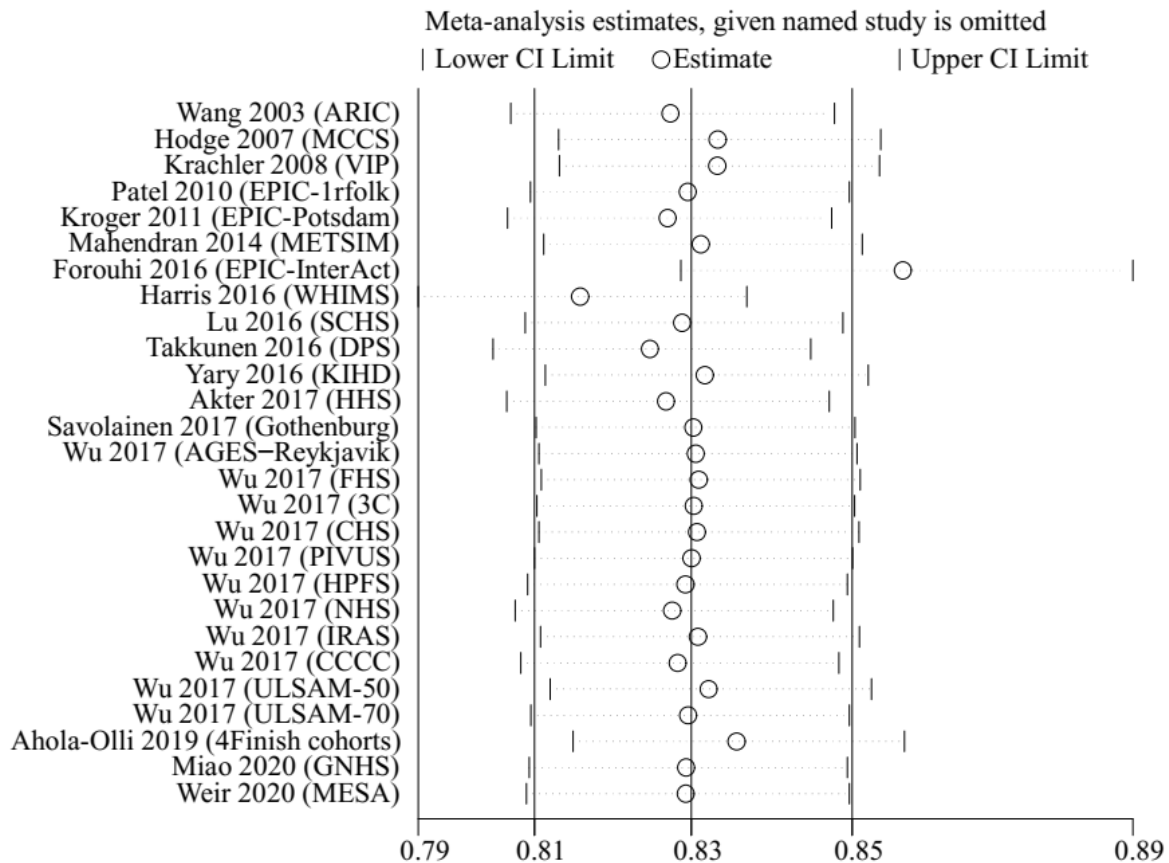

| Study omitted                | Estimate   | [95% Conf. Interval] |            |
|------------------------------|------------|----------------------|------------|
| Wang 2003 (ARIC)             | 0.82800281 | 0.80642682           | 0.85015607 |
| Hodge 2007 (MCCS)            | 0.83436763 | 0.81292611           | 0.85637462 |
| Krachler 2008 (VIP)          | 0.83432788 | 0.8130042            | 0.85621083 |
| Patel 2010 (EPIC-Irforl)     | 0.83033895 | 0.8091063            | 0.85212874 |
| Kroger 2011 (EPIC-Potsdam)   | 0.82760185 | 0.8060444            | 0.84973586 |
| Mahendran 2014 (METSIM)      | 0.83209211 | 0.8108828            | 0.85385609 |
| Forouhi 2016 (EPIC-InterAct) | 0.85935616 | 0.8294003            | 0.89039397 |
| Harris 2016 (WHIMS)          | 0.81581628 | 0.79395521           | 0.83827931 |
| Lu 2016 (SCHS)               | 0.82957214 | 0.8084069            | 0.85129148 |

## Supplementary data

|                              |            |            |            |
|------------------------------|------------|------------|------------|
| Takkunen 2016 (DPS)          | 0.8252269  | 0.80405861 | 0.84695244 |
| Yary 2016 (KIHD)             | 0.83263773 | 0.8111465  | 0.85469836 |
| Akter 2017 (HHS)             | 0.82740724 | 0.80593711 | 0.84944928 |
| Savolainen 2017 (Gothenburg) | 0.83109325 | 0.80987048 | 0.85287225 |
| Wu 2017 (AGES–Reykjavik)     | 0.83142352 | 0.8102513  | 0.85314894 |
| Wu 2017 (FHS)                | 0.83180779 | 0.8105876  | 0.85358351 |
| Wu 2017 (3C)                 | 0.83114254 | 0.8099708  | 0.85286766 |
| Wu 2017 (CHS)                | 0.83156282 | 0.81024951 | 0.85343671 |
| Wu 2017 (PIVUS)              | 0.83084446 | 0.80967987 | 0.85256231 |
| Wu 2017 (HPFS)               | 0.83001834 | 0.80872446 | 0.85187298 |
| Wu 2017 (NHS)                | 0.82823485 | 0.8070344  | 0.8499921  |
| Wu 2017 (IRAS)               | 0.83170283 | 0.81046486 | 0.85349733 |
| Wu 2017 (CCCC)               | 0.8289749  | 0.80780149 | 0.8507033  |
| Wu 2017 (ULSAM-50)           | 0.83314866 | 0.81175882 | 0.85510212 |
| Wu 2017 (ULSAM-70)           | 0.83038491 | 0.80917603 | 0.85214967 |
| Ahola-Olli 2019 (4Finish)    | 0.83692056 | 0.81488127 | 0.85955596 |
| Miao 2020 (GNHS)             | 0.83010888 | 0.80893362 | 0.85183847 |
| Weir 2020 (MESA)             | 0.83006662 | 0.80854106 | 0.85216528 |

---

|                 |                   |                  |                   |
|-----------------|-------------------|------------------|-------------------|
| <b>Combined</b> | <b>0.83080347</b> | <b>0.8096602</b> | <b>0.85249887</b> |
|-----------------|-------------------|------------------|-------------------|

---

## Supplementary data

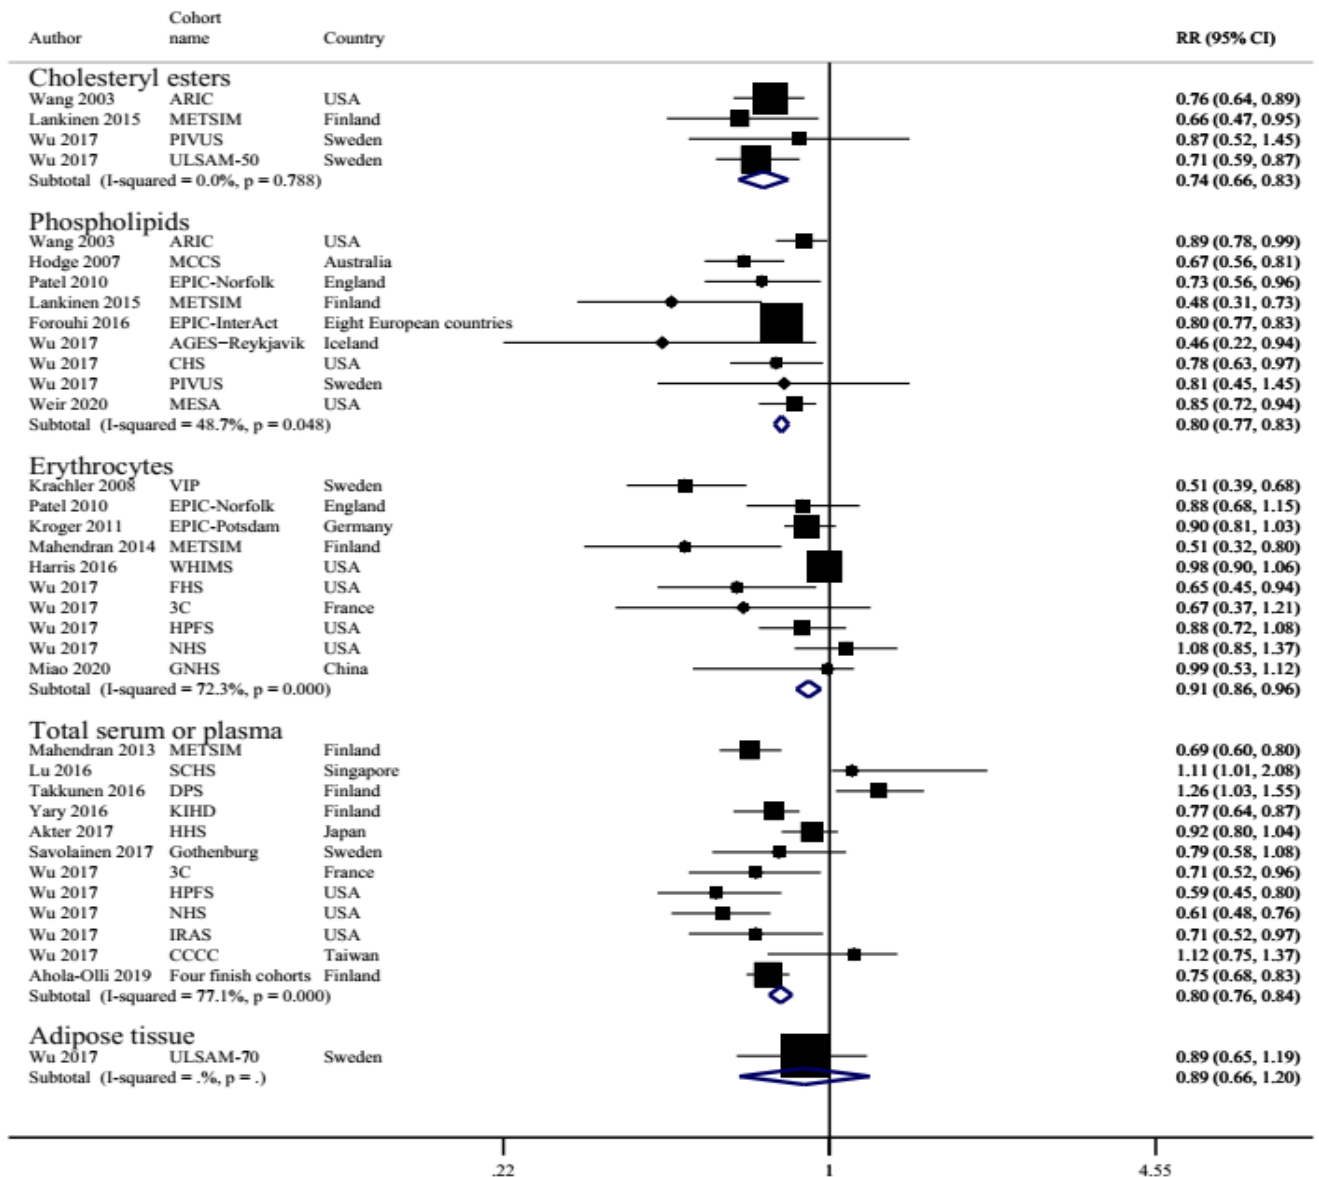

**Supplemental Figure 6.** Pooled relative risks of type 2 diabetes for each standard deviation increment in linoleic acid biomarker, per lipid compartment.

## Supplementary data

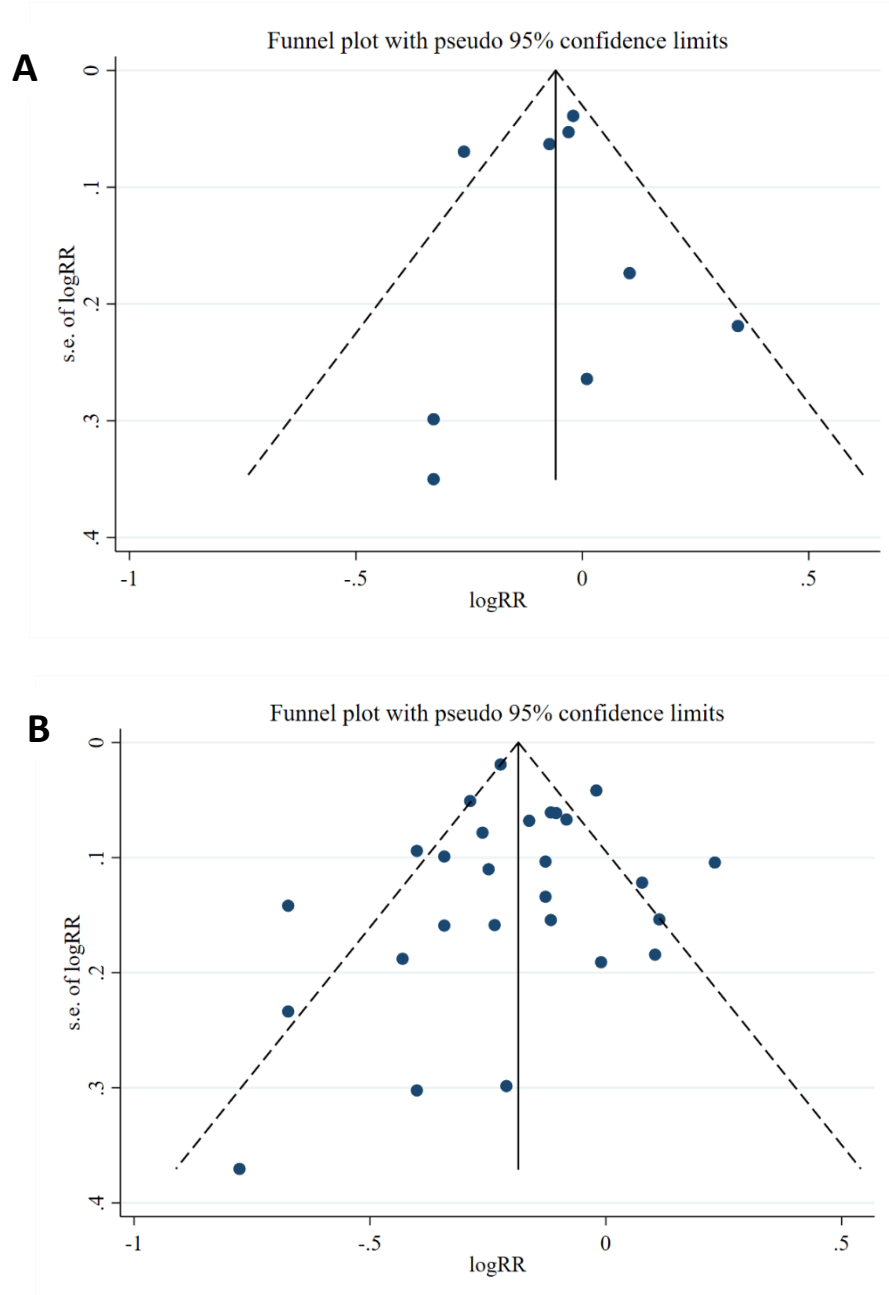

**Supplemental Figure 7.** Funnel plot demonstrating publication bias in the studies reporting the association of A) dietary intake, and B) biomarkers of LA and type 2 diabetes

## Supplementary data

| Section/topic                      | #  | Checklist item                                                                                                                                                                                                                                                                                              | Reported on page #                                                   |
|------------------------------------|----|-------------------------------------------------------------------------------------------------------------------------------------------------------------------------------------------------------------------------------------------------------------------------------------------------------------|----------------------------------------------------------------------|
| <b>TITLE</b>                       |    |                                                                                                                                                                                                                                                                                                             |                                                                      |
| Title                              | 1  | Identify the report as a systematic review, meta-analysis, or both.                                                                                                                                                                                                                                         | Title                                                                |
| <b>ABSTRACT</b>                    |    |                                                                                                                                                                                                                                                                                                             |                                                                      |
| Structured summary                 | 2  | Provide a structured summary including, as applicable: background; objectives; data sources; study eligibility criteria, participants, and interventions; study appraisal and synthesis methods; results; limitations; conclusions and implications of key findings; systematic review registration number. | Abstract                                                             |
| <b>INTRODUCTION</b>                |    |                                                                                                                                                                                                                                                                                                             |                                                                      |
| Rationale                          | 3  | Describe the rationale for the review in the context of what is already known.                                                                                                                                                                                                                              | Introduction, paragraph 1                                            |
| Objectives                         | 4  | Provide an explicit statement of questions being addressed with reference to participants, interventions, comparisons, outcomes, and study design (PICOS).                                                                                                                                                  | Introduction, paragraph 2                                            |
| <b>METHODS</b>                     |    |                                                                                                                                                                                                                                                                                                             |                                                                      |
| Protocol and registration          | 5  | Indicate if a review protocol exists, if and where it can be accessed (e.g., Web address), and, if available, provide registration information including registration number.                                                                                                                               | Methods, paragraph 1                                                 |
| Eligibility criteria               | 6  | Specify study characteristics (e.g., PICOS, length of follow-up) and report characteristics (e.g., years considered, language, publication status) used as criteria for eligibility, giving rationale.                                                                                                      | Methods, Eligibility criteria, paragraphs 3                          |
| Information sources                | 7  | Describe all information sources (e.g., databases with dates of coverage, contact with study authors to identify additional studies) in the search and date last searched.                                                                                                                                  | Methods, Literature search, paragraph 1 and 2                        |
| Search                             | 8  | Present full electronic search strategy for at least one database, including any limits used, such that it could be repeated.                                                                                                                                                                               | Methods, Literature search, paragraph 1                              |
| Study selection                    | 9  | State the process for selecting studies (i.e., screening, eligibility, included in systematic review, and, if applicable, included in the meta-analysis).                                                                                                                                                   | Results, paragraph 1                                                 |
| Data collection process            | 10 | Describe method of data extraction from reports (e.g., piloted forms, independently, in duplicate) and any processes for obtaining and confirming data from investigators.                                                                                                                                  | Methods, data extraction, paragraph 1                                |
| Data items                         | 11 | List and define all variables for which data were sought (e.g., PICOS, funding sources) and any assumptions and simplifications made.                                                                                                                                                                       | Methods, data extraction, paragraph 1                                |
| Risk of bias in individual studies | 12 | Describe methods used for assessing risk of bias of individual studies (including specification of whether this was done at the study or outcome level), and how this information is to be used in any data synthesis.                                                                                      | Methods, data extraction, paragraph 2                                |
| Summary measures                   | 13 | State the principal summary measures (e.g., risk ratio, difference in means).                                                                                                                                                                                                                               | Methods, Data synthesis and statistical analysis, paragraph 1        |
| Synthesis of results               | 14 | Describe the methods of handling data and combining results of studies, if done, including measures of consistency (e.g., $I^2$ ) for each meta-analysis.                                                                                                                                                   | Methods, Data synthesis and statistical analysis, paragraphs 1 and 2 |

Supplementary data  
Page 1 of 2

| Section/topic                 | #  | Checklist item                                                                                                                                                                                           | Reported on page #                                                                                                                          |
|-------------------------------|----|----------------------------------------------------------------------------------------------------------------------------------------------------------------------------------------------------------|---------------------------------------------------------------------------------------------------------------------------------------------|
| Risk of bias across studies   | 15 | Specify any assessment of risk of bias that may affect the cumulative evidence (e.g., publication bias, selective reporting within studies).                                                             | Methods, data extraction, paragraph 2                                                                                                       |
| Additional analyses           | 16 | Describe methods of additional analyses (e.g., sensitivity or subgroup analyses, meta-regression), if done, indicating which were pre-specified.                                                         | Methods, Data synthesis and statistical analysis, paragraph 2                                                                               |
| <b>RESULTS</b>                |    |                                                                                                                                                                                                          |                                                                                                                                             |
| Study selection               | 17 | Give numbers of studies screened, assessed for eligibility, and included in the review, with reasons for exclusions at each stage, ideally with a flow diagram.                                          | Results, paragraph 1 & Fig. 1                                                                                                               |
| Study characteristics         | 18 | For each study, present characteristics for which data were extracted (e.g., study size, PICOS, follow-up period) and provide the citations.                                                             | Supplementary Table 3 and 4                                                                                                                 |
| Risk of bias within studies   | 19 | Present data on risk of bias of each study and, if available, any outcome level assessment (see item 12).                                                                                                | Results, LA intake and risk of T2DM, paragraph 1<br>Supplementary Table 5                                                                   |
| Results of individual studies | 20 | For all outcomes considered (benefits or harms), present, for each study: (a) simple summary data for each intervention group (b) effect estimates and confidence intervals, ideally with a forest plot. | Supplementary Table 3 and 4                                                                                                                 |
| Synthesis of results          | 21 | Present results of each meta-analysis done, including confidence intervals and measures of consistency.                                                                                                  | Results, paragraph 1 for each outcome; Fig. 2-4                                                                                             |
| Risk of bias across studies   | 22 | Present results of any assessment of risk of bias across studies (see Item 15).                                                                                                                          | Results, end of the paragraph 1 for each outcome                                                                                            |
| Additional analysis           | 23 | Give results of additional analyses, if done (e.g., sensitivity or subgroup analyses, meta-regression [see Item 16]).                                                                                    | Results, LA intake and risk of T2DM; paragraph 2<br>Biomarkers of LA and risk of T2DM; paragraph 2<br>Tables 1-2;<br>Supplementary Fig. 1-5 |
| <b>DISCUSSION</b>             |    |                                                                                                                                                                                                          |                                                                                                                                             |
| Summary of evidence           | 24 | Summarize the main findings including the strength of evidence for each main outcome; consider their relevance to key groups (e.g., healthcare providers, users, and policy makers).                     | Discussion, paragraph 1                                                                                                                     |
| Limitations                   | 25 | Discuss limitations at study and outcome level (e.g., risk of bias), and at review-level (e.g., incomplete retrieval of identified research, reporting bias).                                            | Discussion, paragraph 6                                                                                                                     |
| Conclusions                   | 26 | Provide a general interpretation of the results in the context of other evidence, and implications for future research.                                                                                  | Discussion, paragraph 7                                                                                                                     |
| <b>FUNDING</b>                |    |                                                                                                                                                                                                          |                                                                                                                                             |
| Funding                       | 27 | Describe sources of funding for the systematic review and other support (e.g., supply of data); role of funders for the systematic review.                                                               | Footnotes, funding                                                                                                                          |

## Supplementary data

*From:* Moher D, Liberati A, Tetzlaff J, Altman DG, The PRISMA Group (2009). Preferred Reporting Items for Systematic Reviews and Meta-Analyses: The PRISMA Statement. PLoS Med 6(7): e1000097. doi:10.1371/journal.pmed1000097

For more information, visit: [www.prisma-statement.org](http://www.prisma-statement.org).



Supplementary data  
**MOOSE Checklist for Meta-analyses of Observational Studies**

| Item No                                     | Recommendation                                                                                                                                                       | Reported on Page No     |
|---------------------------------------------|----------------------------------------------------------------------------------------------------------------------------------------------------------------------|-------------------------|
| Reporting of background should include      |                                                                                                                                                                      |                         |
| 1                                           | Problem definition                                                                                                                                                   | 5-6                     |
| 2                                           | Hypothesis statement                                                                                                                                                 | 6                       |
| 3                                           | Description of study outcome(s)                                                                                                                                      | 6                       |
| 4                                           | Type of exposure or intervention used                                                                                                                                | 6                       |
| 5                                           | Type of study designs used                                                                                                                                           | 6                       |
| 6                                           | Study population                                                                                                                                                     | 6                       |
| Reporting of search strategy should include |                                                                                                                                                                      |                         |
| 7                                           | Qualifications of searchers (eg, librarians and investigators)                                                                                                       | Title page, 6           |
| 8                                           | Search strategy, including time period included in the synthesis and key words                                                                                       | 6                       |
| 9                                           | Effort to include all available studies, including contact with authors                                                                                              | 6-7                     |
| 10                                          | Databases and registries searched                                                                                                                                    | 6                       |
| 11                                          | Search software used, name and version, including special features used (e.g., explosion)                                                                            | None                    |
| 12                                          | Use of hand searching (eg, reference lists of obtained articles)                                                                                                     | 7                       |
| 13                                          | List of citations located and those excluded, including justification                                                                                                | Supplementary Table 1-2 |
| 14                                          | Method of addressing articles published in languages other than English                                                                                              | 7                       |
| 15                                          | Method of handling abstracts and unpublished studies                                                                                                                 | 7                       |
| 16                                          | Description of any contact with authors                                                                                                                              | None                    |
| Reporting of methods should include         |                                                                                                                                                                      |                         |
| 17                                          | Description of relevance or appropriateness of studies assembled for assessing the hypothesis to be tested                                                           | 7-8                     |
| 18                                          | Rationale for the selection and coding of data (eg, sound clinical principles or convenience)                                                                        | 7                       |
| 19                                          | Documentation of how data were classified and coded (eg, multiple raters, blinding and interrater reliability)                                                       | 8                       |
| 20                                          | Assessment of confounding (eg, comparability of cases and controls in studies where appropriate)                                                                     | 8                       |
| 21                                          | Assessment of study quality, including blinding of quality assessors, stratification or regression on possible predictors of study results                           | 8                       |
| 22                                          | Assessment of heterogeneity                                                                                                                                          | 9-10                    |
| 23                                          | Description of statistical methods (eg, complete description of fixed or random effects models, justification of whether the chosen models account for predictors of | 5-6                     |

## Supplementary data

|                                     |                                                                                                         |                           |
|-------------------------------------|---------------------------------------------------------------------------------------------------------|---------------------------|
|                                     | study results, dose-response models, or cumulative meta-analysis) in sufficient detail to be replicated |                           |
| 24                                  | Provision of appropriate tables and graphics                                                            | Tables 1-2<br>Figures 1-4 |
| Reporting of results should include |                                                                                                         |                           |
| 25                                  | Graphic summarizing individual study estimates and overall estimate                                     | Figure 1                  |
| 26                                  | Table giving descriptive information for each study included                                            | Table S 3-4               |
| 27                                  | Results of sensitivity testing (eg, subgroup analysis)                                                  | 12-13                     |
| 28                                  | Indication of statistical uncertainty of findings                                                       | 12-14<br>Table S7         |

| Item No                                 | Recommendation                                                                                                            | Reported on Page No |
|-----------------------------------------|---------------------------------------------------------------------------------------------------------------------------|---------------------|
| Reporting of discussion should include  |                                                                                                                           |                     |
| 29                                      | Quantitative assessment of bias (eg, publication bias)                                                                    | 14                  |
| 30                                      | Justification for exclusion (eg, exclusion of non-English language citations)                                             | 7                   |
| 31                                      | Assessment of quality of included studies                                                                                 | Table S5            |
| Reporting of conclusions should include |                                                                                                                           |                     |
| 32                                      | Consideration of alternative explanations for observed results                                                            | 15-1                |
| 33                                      | Generalization of the conclusions (ie, appropriate for the data presented and within the domain of the literature review) | 15-1                |
| 34                                      | Guidelines for future research                                                                                            | 19                  |
| 35                                      | Disclosure of funding source                                                                                              | 21                  |
